# Supplementary material
Source: MDPI journal article supplement (https://www.mdpi.com/1999-4907/14/3/457)
Supplement: s1 [file s1]

## Supplementary Materials

**Table S1.** A total of 183 metabolites were identified and their concentrations were determined.

| RT      | Peaks                               | VIP      | p value    | FC(T/O)      | VIP       | p value     | FC(T/N)  | VIP     | p value  | FC(O/N)  |
|---------|-------------------------------------|----------|------------|--------------|-----------|-------------|----------|---------|----------|----------|
| 11.2204 | Citraconic acid degr1               | 0.009634 | 0.98350859 | 1.087158482  | 0.994365  | 0.018730906 | 1.413805 | 1.30659 | 0.000283 | 1.300459 |
| 9.29662 | 4-Androsten-11beta-ol-3,17-dione 1  | 1.29E-01 | 0.78055717 | 1.055616439  | 0.865751  | 0.040977594 | 7.04258  | 1.19957 | 0.001032 | 6.671533 |
| 25.8678 | malonic acid 1                      | 1.32E-01 | 0.78096838 | 0.880294483  | 0.778666  | 0.054565967 | 0.602697 | 1.00238 | 0.009441 | 0.684654 |
| 26.9555 | L-Threose 1                         | 0.204483 | 0.6592374  | 1.314593964  | 0.921838  | 0.016945786 | 0.487327 | 1.01342 | 0.011871 | 0.370706 |
| 10.9712 | proline                             | 0.307567 | 0.52229702 | 1.538691623  | 0.590557  | 0.180285553 | 6.267738 | 1.01306 | 0.006378 | 4.07342  |
| 20.4153 | galactose 2                         | 0.415009 | 0.3714367  | 1.532244605  | 0.774153  | 0.046661072 | 0.557011 | 1.08732 | 0.004593 | 0.363526 |
| 11.7222 | Pelargonic acid                     | 0.476293 | 0.2791267  | 0.694617469  | 0.718819  | 0.103854977 | 3.208783 | 1.04436 | 0.010129 | 4.619497 |
| 8.11328 | lactic acid                         | 0.538541 | 0.22637481 | 0.630658     | 0.546646  | 0.219305262 | 154.9214 | 1.11532 | 0.005682 | 245.6504 |
| 16.0173 | fucose 2                            | 0.654089 | 0.12957195 | 0.615286565  | 0.847032  | 0.045937828 | 6.091312 | 1.18565 | 0.00219  | 9.899959 |
| 13.4598 | indole-3-acetic acid                | 0.662111 | 0.16907266 | 21801.11708  | 0.800574  | 0.043375103 | 0.709929 | 1.35587 | 0.000422 | 3.26E-05 |
| 24.8044 | malonic acid 1                      | 0.701519 | 0.13607262 | 1.655901343  | 0.696055  | 0.08046902  | 0.6138   | 1.23594 | 0.001184 | 0.370675 |
| 25.6064 | Linoleic acid methyl ester          | 7.92E-01 | 0.0858572  | 1.521247031  | 0.495741  | 2.50E-01    | 0.894917 | 1.41231 | 9.62E-06 | 0.588279 |
| 13.7621 | Glucose-1-phosphate                 | 0.817509 | 0.06157299 | 0.8804508    | 0.45079   | 0.2766363   | 1.249178 | 1.13931 | 0.0015   | 1.418794 |
| 29.0115 | beta-Mannosylglycerate 2            | 0.893748 | 0.05310125 | 0.7873863880 | 0.467242  | 9.16E-01    | 1.15773  | 1.43988 | 1.03E-05 | 1.470345 |
| 14.0543 | oxoproline                          | 0.95519  | 0.03433365 | 1.379915679  | 0.210184  | 0.626676416 | 1.140831 | 1.05718 | 0.004065 | 0.826739 |
| 25.657  | linolenic acid                      | 1.02162  | 0.02842037 | 3.522414474  | 0.323145  | 4.65E-01    | 1.267257 | 1.4548  | 2.96E-06 | 0.359769 |
| 10.3809 | 2-Deoxyerythritol                   | 1.13569  | 0.01508373 | 242719.2238  | 0.340496  | 0.4207809   | 1.690894 | 1.06368 | 0.008759 | 6.97E-06 |
| 20.5299 | D-erythronolactone 2                | 1.14802  | 0.00507242 | 2.371431828  | 0.590181  | 0.135883604 | 0.627303 | 1.20018 | 0.001171 | 0.264525 |
| 24.6748 | Indolelactate 2                     | 1.18107  | 0.00607364 | 0.52003833   | 0.112128  | 0.792147985 | 2.278772 | 1.31899 | 0.00011  | 4.381931 |
| 32.1968 | 2-Monoolein                         | 1.18636  | 0.00373925 | 0.649446067  | 0.786958  | 0.0417748   | 1.594694 | 1.2867  | 0.000441 | 2.455468 |
| 20.0337 | 2-Keto-L-gulonic acid               | 1.19302  | 0.00811016 | 0.372323929  | 0.900726  | 3.96E-02    | 82152.04 | 1.69295 | 2.78E-09 | 220646.7 |
| 20.1654 | glucose 2                           | 1.20407  | 0.00207157 | 0.737475691  | 0.580235  | 1.48E-01    | 1.368126 | 1.31256 | 9.55E-05 | 1.855148 |
| 24.9551 | heptadecanoic acid                  | 1.27584  | 0.00189096 | 1.530331624  | 0.281354  | 0.508718817 | 1.095363 | 1.2535  | 0.000275 | 0.715768 |
| 15.6393 | maleic acid                         | 1.40E+00 | 0.00011932 | 0.575432763  | 0.511359  | 2.00E-01    | 1.283651 | 1.35612 | 4.14E-05 | 2.230758 |
| 18.9218 | Diglycerol 2                        | 1.41E+00 | 0.0007717  | 5.579878683  | 0.549957  | 0.183134585 | 1.340554 | 1.21664 | 0.000966 | 0.240248 |
| 17.4775 | D-(glycerol 1-phosphate)            | 1.45708  | 0.00040019 | 6.7716312930 | 0.0645718 | 8.83E-01    | 1.115356 | 1.6113  | 1.72E-09 | 0.16471  |
| 12.2533 | Carnitine                           | 1.46E+00 | 0.00018935 | 2.5630776980 | 0.0314203 | 0.938987625 | 0.989158 | 1.2655  | 0.000579 | 0.385926 |
| 20.3322 | beta-Mannosylglycerate 1            | 1.47199  | 0.00043945 | 13.64662868  | 0.635223  | 0.106510042 | 0.597729 | 1.29399 | 0.000821 | 0.0438   |
| 27.7594 | Linoleic acid methyl ester          | 1.51113  | 8.00E-05   | 1.979801503  | 0.872945  | 3.14E-02    | 1.294023 | 1.3144  | 9.20E-05 | 0.653612 |
| 12.5133 | lactic acid                         | 1.5124   | 0.00039106 | 3.508823166  | 0.5294    | 0.191664537 | 1.336647 | 1.18808 | 0.002691 | 0.380939 |
| 27.4989 | Zymosterol 2                        | 1.52967  | 0.00017414 | 6.789757947  | 0.135171  | 7.47E-01    | 0.991559 | 1.44252 | 4.02E-05 | 0.146037 |
| 12.2537 | Diglycerol 2                        | 1.56E+00 | 6.92E-05   | 0.1165833090 | 0.0366401 | 9.32E-01    | 0.997544 | 1.57963 | 5.41E-08 | 8.556488 |
| 25.4705 | Dehydroepiandrosterone              | 1.57938  | 0.00016255 | 104301.1186  | 0.305869  | 4.59E-01    | 0.901538 | 1.52555 | 1.99E-05 | 8.64E-06 |
| 9.98655 | Prostaglandin E2 2                  | 1.58608  | 3.05E-06   | 4.414348121  | 0.332291  | 0.409270396 | 1.048561 | 1.20494 | 0.001107 | 0.237535 |
| 12.1551 | Ethyl cinnamate                     | 1.6154   | 8.42E-05   | 167535.3391  | 0.797904  | 0.043193637 | 1.821117 | 1.33917 | 0.000528 | 1.09E-05 |
| 10.6488 | 2-Deoxyerythritol                   | 1.61633  | 3.50E-05   | 3.970516012  | 0.701324  | 1.01E-01    | 1.245116 | 1.62735 | 7.88E-10 | 0.313591 |
| 20.7883 | fructose 1                          | 1.66178  | 3.53E-07   | 17.45153723  | 0.474837  | 0.233190873 | 0.685864 | 1.09007 | 0.006633 | 0.039301 |
| 31.9669 | prunin degr. Prod. 2                | 1.66571  | 2.39E-06   | 2.904023019  | 0.805498  | 4.76E-02    | 1.326741 | 1.56702 | 4.64E-08 | 0.456863 |
| 15.2173 | (+)-Dihydrocarveol                  | 1.66615  | 2.72E-05   | 105338.1499  | 0.551447  | 1.86E-01    | 0.889834 | 1.66557 | 5.82E-08 | 8.45E-06 |
| 24.4579 | thymidine 5'-monophosphate 1        | 1.67394  | 1.90E-05   | 5.712345652  | 0.986922  | 1.72E-02    | 1.432596 | 1.65926 | 1.54E-08 | 0.250789 |
| 14.2641 | Threonic acid                       | 1.68E+00 | 1.42E-06   | 0.301079962  | 0.726992  | 6.80E-02    | 0.864943 | 1.57087 | 2.98E-06 | 2.872803 |
| 9.50779 | epsilon-Caprolactam                 | 1.69549  | 1.48E-08   | 0.127815032  | 0.684604  | 8.05E-02    | 0.441595 | 1.44934 | 3.85E-06 | 3.454957 |
| 20.5483 | methyl heptadecanoate               | 1.72874  | 3.13E-06   | 8.728164315  | 0.51846   | 1.97E-01    | 1.233216 | 1.52346 | 1.89E-05 | 0.141292 |
| 23.74   | pentadecanoic acid                  | 1.74E+00 | 3.50E-07   | 2.834128132  | 0.181295  | 6.63E-01    | 1.082514 | 1.63717 | 4.12E-08 | 0.381957 |
| 25.8734 | N-Methyl-L-glutamic acid 3          | 1.75403  | 1.52E-10   | 12.82253435  | 0.824542  | 3.34E-02    | 1.353106 | 1.60929 | 1.76E-09 | 0.105526 |
| 24.6943 | linolenic acid                      | 1.75496  | 9.40E-08   | 3.680046879  | 0.953513  | 2.30E-02    | 1.225145 | 1.6928  | 1.39E-14 | 0.332916 |
| 18.4685 | citric acid                         | 1.79807  | 1.69E-13   | 0.181611602  | 1.28595   | 0.000454624 | 0.278545 | 1.10255 | 0.00472  | 1.53374  |
| 13.393  | cis-1,2-Dihydronaphthalene-1,2-diol | 1.78826  | 1.10E-07   | 131334.5835  | 1.65002   | 1.10E-07    | 205263.7 | 1.51437 | 1.28E-05 | 1.562907 |
| 24.6155 | linoleic acid                       | 1.77608  | 9.19E-08   | 4.875438327  | 1.46955   | 9.50E-05    | 1.625859 | 1.70565 | 5.17E-16 | 0.333479 |
| 8.53839 | 5-Dihydrocortisol 1                 | 1.74736  | 1.66E-06   | 725390.8924  | 1.46128   | 1.21E-05    | 3.131242 | 1.52233 | 2.15E-05 | 4.32E-06 |
| 27.2841 | Analyte 368                         | 1.74E+00 | 2.87E-06   | 227592.5879  | 1.01777   | 6.45E-03    | 0.774082 | 1.66915 | 4.31E-08 | 3.4E-06  |
| 27.0315 | stearic acid                        | 1.72E+00 | 1.62E-07   | 19.04090152  | 1.01293   | 7.54E-03    | 1.496156 | 1.55546 | 2.64E-07 | 0.078576 |

|         |                                               |          |            |             |         |             |          |         |          |          |
|---------|-----------------------------------------------|----------|------------|-------------|---------|-------------|----------|---------|----------|----------|
| 13.3327 | L-Malic acid                                  | 1.71965  | 8.33E-09   | 0.318978532 | 1.48047 | 2.22E-06    | 0.533612 | 1.48351 | 8.33E-06 | 1.672878 |
| 22.3688 | palmitic acid                                 | 1.72E+00 | 3.77E-07   | 2.597038934 | 1.21403 | 3.14E-03    | 1.310076 | 1.66189 | 1.10E-09 | 0.50445  |
| 8.58041 | sarcosine                                     | 1.67E+00 | 1.05E-05   | 2.758681781 | 1.58845 | 3.00E-06    | 3.912536 | 1.42373 | 9.76E-06 | 1.418263 |
| 10.9508 | oxalic acid                                   | 1.66438  | 2.42E-07   | 0.45406346  | 1.30941 | 9.02E-05    | 0.683817 | 1.35653 | 7.05E-05 | 1.505995 |
| 35.3087 | Galactinol 1                                  | 1.65E+00 | 9.56E-07   | 2.645100348 | 1.23755 | 7.50E-04    | 0.526298 | 1.51435 | 1.63E-05 | 0.198971 |
| 34.5937 | Galactinol 1                                  | 1.64E+00 | 1.69E-05   | 3.21014742  | 1.30796 | 1.07E-03    | 1.777171 | 1.55192 | 1.56E-07 | 0.553611 |
| 9.66629 | Biphenyl                                      | 1.62405  | 3.66E-06   | 17.9651676  | 1.18834 | 0.00103185  | 2.352245 | 1.17413 | 0.001064 | 0.130934 |
| 9.24869 | 4-aminobutyric acid 3                         | 1.60911  | 3.15E-05   | 2.131703821 | 1.56024 | 2.75E-06    | 3.115348 | 1.31506 | 8.95E-05 | 1.461435 |
| 14.0999 | 4-aminobutyric acid 1                         | 1.58844  | 4.63E-05   | 2.096403378 | 1.53109 | 5.27E-06    | 2.796614 | 1.10455 | 0.002357 | 1.334006 |
| 24.363  | Turanose 2                                    | 1.57124  | 1.01E-05   | 0.137923744 | 1.52362 | 1.85E-07    | 0.077869 | 1.27391 | 0.000492 | 0.56458  |
| 21.9989 | fucose 1                                      | 1.523    | 9.50E-06   | 2.663075242 | 1.26757 | 1.99E-04    | 0.740847 | 1.5856  | 8.64E-09 | 0.278192 |
| 18.237  | shikimic acid                                 | 1.50E+00 | 3.14E-05   | 2.215977415 | 1.56555 | 1.60E-06    | 3.618776 | 1.13777 | 0.002389 | 1.633038 |
| 30.9179 | Tagatose 2                                    | 1.50E+00 | 7.97E-05   | 0.560972818 | 1.47128 | 2.63E-05    | 0.248739 | 1.35553 | 0.000223 | 0.443407 |
| 24.1337 | 2-Monoolein                                   | 1.50E+00 | 0.00032242 | 3.159254094 | 1.00759 | 0.010305252 | 1.682628 | 1.09282 | 0.004162 | 0.532603 |
| 31.8928 | squalene                                      | 1.49255  | 0.00057821 | 10.05251154 | 1.07845 | 3.05E-03    | 0.5211   | 1.53397 | 1.60E-05 | 0.051838 |
| 14.9356 | Threonic acid                                 | 1.46623  | 0.00015163 | 1.691573375 | 1.55373 | 7.26E-06    | 2.622768 | 1.37532 | 9.06E-05 | 1.55049  |
| 22.7341 | malonic acid 1                                | 1.47E+00 | 0.00024607 | 2.152124282 | 1.57874 | 2.64E-06    | 9.649693 | 1.56959 | 1.46E-07 | 4.483799 |
| 14.6339 | 2-Deoxyerythritol                             | 1.39512  | 0.00013773 | 0.654897436 | 1.48261 | 9.17E-07    | 0.518892 | 1.0082  | 0.006826 | 0.792326 |
| 18.6615 | citrulline 1                                  | 1.36468  | 0.00098623 | 2.106087356 | 1.52451 | 2.66E-05    | 9.594272 | 1.48913 | 1.08E-05 | 4.555496 |
| 21.882  | myo-inositol                                  | 1.32725  | 0.0013205  | 3.04559E-05 | 1.64595 | 1.62E-08    | 1.61E-05 | 1.13158 | 0.002782 | 0.530231 |
| 21.6943 | oxalic acid                                   | 1.29E+00 | 0.00074413 | 1.579672673 | 1.41891 | 9.15E-06    | 0.564402 | 1.57942 | 8.05E-08 | 0.357291 |
| 11.4168 | uracil                                        | 1.25E+00 | 0.00138283 | 1.750881131 | 1.61431 | 1.45E-07    | 4.280638 | 1.09461 | 0.005904 | 2.444848 |
| 28.3075 | arbutin                                       | 1.22596  | 0.0023782  | 2.475960772 | 1.65816 | 2.74E-08    | 112.401  | 1.07934 | 0.00765  | 45.39691 |
| 23.2809 | trans-3,5-Dimethoxy-4-hydroxycinnamaldehyde 1 | 1.18853  | 0.00261129 | 0.209559478 | 1.48015 | 8.23E-07    | 0.108666 | 1.20292 | 0.000617 | 0.518547 |
| 15.5195 | conduritol b epoxide 2                        | 1.13E+00 | 0.005502   | 0.476758422 | 1.4699  | 1.58E-06    | 0.2457   | 1.27139 | 0.000207 | 0.515355 |
| 10.494  | phosphate                                     | 1.10564  | 0.00763385 | 0.678855772 | 1.44491 | 9.42E-06    | 0.319288 | 1.37791 | 0.000139 | 0.470332 |
| 16.6482 | fucose 2                                      | 1.021    | 0.02398518 | 1.853870876 | 1.25632 | 0.002184839 | 3.285345 | 1.18295 | 0.001624 | 1.772154 |
| 20.1533 | D-Talose 2                                    | 0.988628 | 0.01602409 | 2.696553201 | 1.25489 | 1.39E-03    | 0.658321 | 1.47514 | 2.70E-05 | 0.244134 |
| 36.681  | 3-Hydroxypropionic acid 1                     | 0.983929 | 0.01789453 | 0.536877901 | 1.42088 | 8.67E-06    | 5.442066 | 1.42362 | 5.26E-05 | 10.13651 |
| 11.9122 | L-Allothreonine 1                             | 0.982936 | 0.02395272 | 1.356958411 | 1.40088 | 0.000103116 | 1.818817 | 1.28967 | 0.000174 | 1.340363 |
| 9.28022 | N-epsilon-Acetyl-L-lysine 2                   | 9.76E-01 | 0.02101741 | 1.30899316  | 1.39429 | 1.36E-05    | 2.135653 | 1.20697 | 0.000642 | 1.631523 |
| 28.6107 | Glucose-1-phosphate                           | 9.52E-01 | 0.02299942 | 0.862880121 | 1.43509 | 8.27E-06    | 0.540442 | 1.34435 | 0.000132 | 0.626323 |
| 9.58847 | oxalic acid                                   | 9.52E-01 | 0.04392273 | 1.79929318  | 1.00808 | 0.019643776 | 2.118022 | 1.10244 | 0.002933 | 1.177141 |
| 14.5891 | 3,6-Anhydro-D-galactose 1                     | 9.31E-01 | 0.02478353 | 0.635100652 | 1.45938 | 1.96E-05    | 0.219908 | 1.42966 | 6.02E-05 | 0.346258 |
| 30.4995 | xylitol                                       | 0.91745  | 0.03441317 | 1.526351169 | 1.63805 | 3.53E-10    | 0.404096 | 1.69488 | 5.51E-15 | 0.264747 |
| 9.41394 | Methyl Phosphate                              | 0.875393 | 0.05281379 | 1.734781391 | 1.10281 | 2.26E-03    | 0.59537  | 1.41634 | 6.51E-05 | 0.343196 |
| 13.9039 | lactic acid                                   | 8.53E-01 | 0.05583239 | 1.710877431 | 1.4312  | 2.57E-04    | 11155.62 | 1.47729 | 5.75E-05 | 6520.408 |
| 14.3411 | 1-Hydroxyanthraquinone 1                      | 8.26E-01 | 0.0671368  | 1.332422068 | 1.19042 | 0.003501694 | 1.732971 | 1.03615 | 0.006514 | 1.300617 |
| 19.9514 | hexadecane                                    | 0.781016 | 0.06458696 | 1.459208663 | 1.62956 | 5.92E-07    | 329446.3 | 1.41327 | 0.00018  | 225770.5 |
| 19.629  | Gluconic lactone 1                            | 7.66E-01 | 0.07394879 | 0.799432484 | 1.54458 | 2.22E-05    | 227967.8 | 1.61496 | 1.13E-06 | 285162.1 |
| 10.0679 | Methylmalonic acid                            | 7.51E-01 | 0.08125995 | 1.446442472 | 1.3954  | 0.000161097 | 2.488917 | 1.10351 | 0.004208 | 1.720717 |
| 21.3247 | isocitric acid 2                              | 7.51E-01 | 0.10400487 | 1.241753117 | 1.36637 | 3.81E-05    | 0.426548 | 1.50918 | 1.63E-05 | 0.343505 |
| 15.7238 | Tagatose 1                                    | 0.751123 | 0.08320387 | 1.22060949  | 1.39324 | 1.64E-05    | 0.669563 | 1.53656 | 1.25E-07 | 0.548548 |
| 17.6124 | Glucose-1-phosphate                           | 0.749233 | 0.08725167 | 0.888906913 | 1.22118 | 0.001001911 | 0.436916 | 1.17594 | 0.002757 | 0.491521 |
| 13.4967 | glutamine 1                                   | 0.746189 | 0.09909768 | 1.285210835 | 1.17727 | 0.004457937 | 1.576948 | 1.06127 | 0.006252 | 1.226995 |
| 19.5767 | mannose 1                                     | 7.29E-01 | 0.09000584 | 0.677389616 | 1.47696 | 1.67E-06    | 11.02811 | 1.24772 | 0.001035 | 16.2803  |
| 17.1768 | fucose 1                                      | 0.700964 | 0.14361431 | 1.801879715 | 1.02076 | 0.015125149 | 5.814729 | 1.31395 | 0.000326 | 3.227035 |
| 13.81   | aspartic acid 1                               | 0.698654 | 0.1235802  | 1.205953604 | 1.51195 | 4.17E-06    | 2.255584 | 1.57683 | 1.56E-08 | 1.870374 |
| 26.8392 | Thioctamide 1                                 | 0.66648  | 0.12427985 | 0.742552821 | 1.20001 | 0.000753648 | 0.389828 | 1.02714 | 0.006915 | 0.524984 |
| 26.3377 | Carbobenzyloxy-L-leucine degr5                | 6.60E-01 | 0.17076907 | 9870.26941  | 1.31087 | 0.000194113 | 0.170184 | 1.43196 | 0.000132 | 1.72E-05 |
| 11.405  | Glucose-1-phosphate                           | 0.622598 | 0.16656395 | 0.78467194  | 1.39786 | 3.44E-05    | 0.371582 | 1.39407 | 1.53E-05 | 0.473551 |
| 8.95592 | noradrenaline                                 | 0.617993 | 0.17516187 | 1.224316157 | 1.32024 | 7.43E-04    | 1.711376 | 1.37562 | 6.95E-05 | 1.397822 |
| 20.7827 | Gluconic lactone 2                            | 0.593318 | 0.191025   | 0.833955802 | 1.5779  | 1.86E-08    | 0.186015 | 1.61082 | 1.85E-07 | 0.223051 |
| 25.3431 | xylitol                                       | 0.52807  | 0.23021347 | 0.950315412 | 1.37745 | 2.42E-05    | 0.627072 | 1.30976 | 0.000147 | 0.659857 |
| 32.5881 | Lactobionic Acid 1                            | 0.490749 | 0.2555066  | 0.296613654 | 1.48243 | 3.49E-06    | 0.067327 | 1.29686 | 0.000129 | 0.226986 |
| 11.0096 | 2-Monoolein                                   | 0.464653 | 0.31851181 | 0.877573408 | 1.35564 | 3.30E-05    | 0.348462 | 1.40076 | 8.27E-05 | 0.397075 |
| 10.815  | 1,5-Anhydroglucitol                           | 0.463336 | 0.31496021 | 2.265148922 | 1.51931 | 5.53E-07    | 0.145041 | 1.63427 | 4.91E-10 | 0.064032 |
| 13.7325 | malonic acid 2                                | 0.458553 | 0.33269008 | 1.297526238 | 1.15247 | 0.001221994 | 0.429651 | 1.35981 | 0.00028  | 0.331131 |
| 20.0802 | glucose 2                                     | 0.429684 | 0.32023532 | 0.011271375 | 1.51446 | 1.02E-05    | 0.002242 | 1.12665 | 0.002305 | 0.198869 |
| 21.8105 | isocitric acid 2                              | 4.22E-01 | 0.37064676 | 1.200024241 | 1.12732 | 0.002004836 | 0.396265 | 1.28361 | 0.000856 | 0.330214 |
| 26.6474 | Galactinol 3                                  | 4.11E-01 | 0.35893683 | 1.73172267  | 1.00054 | 0.008528398 | 0.278932 | 1.12712 | 0.003685 | 0.161072 |
| 15.283  | 2-Monoolein                                   | 4.08E-01 | 0.36840831 | 0.569415354 | 1.35761 | 3.30E-05    | 0.177292 | 1.36264 | 4.83E-05 | 0.311357 |

|          |                                        |          |            |             |         |             |          |          |          |          |
|----------|----------------------------------------|----------|------------|-------------|---------|-------------|----------|----------|----------|----------|
| 19.9109  | glucose 2                              | 0.402648 | 0.35161727 | 0.015901111 | 1.41601 | 8.94E-05    | 0.000561 | 1.42728  | 9.06E-05 | 0.035262 |
| 32.1784  | salicin                                | 0.385347 | 0.37268431 | 0.055201636 | 1.40203 | 0.000113674 | 0.006015 | 1.28275  | 0.000214 | 0.108973 |
| 16.0655  | fructose 1                             | 3.83E-01 | 0.39346913 | 1.169566316 | 1.22368 | 0.001233505 | 1.712108 | 1.1115   | 0.002767 | 1.463883 |
| 31.7784  | Galactinol 1                           | 3.71E-01 | 0.43318356 | 3.148983614 | 1.20986 | 0.000683894 | 0.103566 | 1.34653  | 0.000384 | 0.032889 |
| 23.106   | myo-inositol                           | 3.69E-01 | 0.40029752 | 0.860890351 | 1.10457 | 0.004440639 | 0.088772 | 1.13478  | 0.004759 | 0.103117 |
| 11.8561  | Glucose-1-phosphate                    | 3.69E-01 | 0.41322611 | 0.970552125 | 1.4404  | 4.77E-06    | 0.483273 | 1.45248  | 1.23E-05 | 0.497936 |
| 14.7657  | Glucose-1-phosphate                    | 0.352003 | 0.43638285 | 2.066403011 | 1.35322 | 5.12E-05    | 0.124775 | 1.44391  | 2.15E-05 | 0.060383 |
| 13.0622  | asparagine 5                           | 0.3516   | 0.43386402 | 1.262288764 | 1.4356  | 0.000215437 | 44.31293 | 1.40888  | 0.000171 | 35.10522 |
| 10.4456  | 4-Vinylphenol dimer                    | 0.34762  | 0.44864873 | 0.998086809 | 1.35827 | 9.58E-05    | 2.190831 | 1.53253  | 1.49E-07 | 2.195031 |
| 20.3085  | sorbitol                               | 2.65E-01 | 0.57173061 | 1.302602315 | 1.28101 | 7.47E-04    | 14.49304 | 1.47706  | 1.33E-06 | 11.12622 |
| 27.0822  | 2-hydroxybutanoic acid                 | 2.54E-01 | 0.56743149 | 0.899446068 | 1.18071 | 0.001117621 | 0.340715 | 1.12938  | 0.002452 | 0.378806 |
| 12.6308  | L-dopa 2                               | 0.252531 | 0.56396352 | 1.099711958 | 1.3749  | 2.06E-05    | 2.172187 | 1.151    | 0.001545 | 1.975233 |
| 15.2684  | ornithine                              | 0.240059 | 0.58867881 | 0.868337946 | 1.26974 | 0.002170712 | 302989.5 | 1.25817  | 0.001404 | 348930.4 |
| 26.3876  | N-Carbamylglutamate 2                  | 2.22E-01 | 0.62215745 | 0.695241945 | 1.23502 | 0.001162558 | 0.019456 | 1.27028  | 0.001215 | 0.027984 |
| 12.5718  | 3-Methylthiopropylamine                | 0.219235 | 0.63111401 | 1.040195189 | 1.35939 | 4.93E-04    | 1.525179 | 1.51598  | 7.69E-06 | 1.466243 |
| 8.05499  | 2-hydroxypyridine                      | 0.206602 | 0.6572129  | 0.958192971 | 1.05838 | 6.33E-03    | 2.23716  | 1.34672  | 4.85E-05 | 2.33477  |
| 25.4611  | ribulose-5-phosphate 2                 | 0.188835 | 0.69259416 | 0.997497749 | 1.16335 | 0.001470127 | 0.556907 | 1.36022  | 0.000168 | 0.558304 |
| 29.1436  | Isopropyl-beta-D-thiogalactopyranoside | 0.188831 | 0.6628185  | 1.180825417 | 1.64224 | 4.74E-09    | 31.02626 | 1.18713  | 0.002795 | 26.27506 |
| 29.753   | xylitol                                | 0.180883 | 0.69514942 | 1.402820457 | 1.06758 | 0.003525407 | 0.541199 | 1.23525  | 0.000602 | 0.385794 |
| 22.9248  | 2-Monoolein                            | 1.73E-01 | 0.69026683 | 1.118238879 | 1.38347 | 3.55E-05    | 5.786756 | 1.14579  | 0.001515 | 5.174883 |
| 24.0887  | Glucose-1-phosphate                    | 0.159767 | 0.7267741  | 1.270845969 | 1.12828 | 0.00505797  | 12.58363 | 1.19116  | 0.001251 | 9.901776 |
| 17.8578  | 2-Deoxyerythritol                      | 1.38E-01 | 0.75670927 | 1.442945124 | 1.15256 | 0.001193003 | 0.361617 | 1.17643  | 0.000908 | 0.25061  |
| 28.4476  | lactose 1                              | 0.115858 | 0.79078458 | 1.010534293 | 1.36238 | 2.95E-05    | 0.476172 | 1.12484  | 0.002224 | 0.471208 |
| 14.8882  | Glucose-1-phosphate                    | 0.105784 | 0.82337264 | 1.127635927 | 1.33199 | 6.55E-05    | 0.495963 | 1.49504  | 8.55E-06 | 0.439826 |
| 25.5091  | beta-Mannosylglycerate 1               | 0.084995 | 0.85082672 | 1.041502001 | 1.00125 | 0.007640822 | 0.792582 | 1.01161  | 0.008983 | 0.760999 |
| 8.98509  | oxalic acid                            | 0.051188 | 0.91179416 | 1.095589235 | 1.21042 | 2.56E-03    | 1.749788 | 1.39074  | 5.75E-05 | 1.597121 |
| 17.2629  | Carnitine                              | 3.32E-02 | 0.93970267 | 1.111379487 | 1.18095 | 0.001702684 | 0.112307 | 1.18049  | 0.00178  | 0.101052 |
| 23.0375  | myo-inositol                           | 0.008986 | 0.98442622 | 1.098728421 | 1.33821 | 4.70E-04    | 18.442   | 1.47937  | 6.73E-06 | 16.78486 |
| 26.1339  | Lactobionic Acid 1                     | 0.019141 | 0.96560685 | 1.00108498  | 1.03583 | 0.008524386 | 1.439041 | 0.904798 | 0.021973 | 1.437482 |
| 27.5503  | ribitol                                | 0.177127 | 0.68667971 | 1.0137723   | 1.15232 | 0.003090668 | 7.544037 | 0.983886 | 0.013534 | 7.44155  |
| 10.427   | glycerol                               | 0.293351 | 0.4975311  | 0.75133521  | 1.10861 | 0.004929544 | 1.289492 | 0.530964 | 0.201859 | 1.716267 |
| 17.17681 | oxalic acid                            | 0.329233 | 0.46428345 | 1.10342932  | 1.0393  | 0.007279139 | 1.387189 | 0.889193 | 0.020672 | 1.257162 |
| 27.1557  | Glucose-1-phosphate                    | 0.35785  | 0.41013893 | 0.935561132 | 1.12786 | 0.005045333 | 10.32251 | 0.951224 | 0.019011 | 11.03349 |
| 17.6007  | Glucose-1-phosphate                    | 0.444768 | 0.31386297 | 0.861818902 | 1.14496 | 0.001322768 | 0.438647 | 0.954132 | 0.011367 | 0.508978 |
| 28.5346  | Diglycerol 2                           | 5.21E-01 | 0.22834219 | 0.116050681 | 1.08242 | 0.005393405 | 0.040079 | 0.678521 | 0.085721 | 0.345355 |
| 24.9673  | 3-Hydroxynorvaline 2                   | 5.34E-01 | 0.23551869 | 0.840545413 | 1.06913 | 0.003447509 | 0.559675 | 0.923159 | 0.016325 | 0.665848 |
| 27.3477  | Tagatose 2                             | 0.555091 | 0.19727188 | 0.209912941 | 1.03493 | 0.006991786 | 0.079732 | 0.697071 | 0.077752 | 0.379833 |
| 17.8037  | glycerol                               | 6.54E-01 | 0.14508058 | 1.856741254 | 1.01962 | 0.014603176 | 4.950588 | 0.665086 | 0.099463 | 2.666278 |
| 9.16161  | oxalic acid                            | 0.674541 | 0.12448463 | 1.43347755  | 1.05031 | 0.012136232 | 1.723719 | 0.500435 | 0.224336 | 1.202473 |
| 8.33988  | malonic acid 1                         | 0.699054 | 0.10499739 | 0.381395742 | 1.49733 | 4.46E-06    | 0.294418 | 0.31534  | 0.446598 | 0.77195  |
| 15.56    | flavin adenine degrad product          | 0.706456 | 0.10487879 | 0.712347396 | 1.09766 | 0.005953533 | 0.588769 | 0.556709 | 0.170483 | 0.82652  |
| 29.246   | 4-nitrocatechol                        | 7.51E-01 | 0.07835709 | 0.131607047 | 1.32652 | 0.000211696 | 0.046504 | 0.976716 | 0.009191 | 0.353356 |
| 14.9805  | 5-Dihydrocortisol 1                    | 7.68E-01 | 0.07004996 | 1.511568321 | 1.06974 | 0.003736073 | 2.121587 | 0.334985 | 0.412424 | 1.403567 |
| 13.9526  | trans-4-hydroxy-L-proline 2            | 0.832401 | 0.06491643 | 2.353565896 | 1.07949 | 0.006662985 | 7.132678 | 0.746606 | 0.05617  | 3.030584 |
| 27.3384  | xylitol                                | 0.885875 | 0.0381944  | 2.170656635 | 1.06676 | 0.005526823 | 4.105479 | 0.372533 | 0.360313 | 1.891353 |
| 29.1854  | Isopropyl-beta-D-thiogalactopyranoside | 9.29E-01 | 0.02524875 | 0.2252377   | 1.32353 | 6.80E-05    | 0.150576 | 0.590351 | 0.140794 | 0.668523 |

|         |                               |          |            |             |         |             |          |          |          |          |
|---------|-------------------------------|----------|------------|-------------|---------|-------------|----------|----------|----------|----------|
| 30.0828 | prunin degr. Prod. 2          | 0.948951 | 0.02154339 | 1.352250503 | 1.33509 | 0.00030916  | 1.440839 | 0.268384 | 0.517435 | 1.065512 |
| 12.5618 | aspartic acid 2               | 0.976075 | 0.01818346 | 1.477969257 | 1.52579 | 2.74E-07    | 2.192641 | 0.880062 | 0.026752 | 1.48355  |
| 28.3427 | Acetol 1                      | 0.984375 | 0.02593074 | 5.516341594 | 1.11658 | 0.007092645 | 21.08607 | 0.503915 | 0.21581  | 3.822474 |
| 26.4271 | Analyte 354                   | 1.01114  | 0.01613729 | 0.79130205  | 1.19266 | 0.000694325 | 0.634628 | 0.733838 | 0.062474 | 0.802005 |
| 23.0846 | Linoleic acid methyl ester    | 1.03787  | 0.01423872 | 3.195005623 | 1.002   | 0.01828247  | 2.555324 | 0.230807 | 0.577624 | 0.799787 |
| 22.7804 | Methyl Palmitoleate           | 1.06401  | 0.01045242 | 1.671271038 | 1.04868 | 0.009653015 | 1.594104 | 0.129922 | 0.752998 | 0.953827 |
| 8.10247 | lactic acid                   | 1.09067  | 0.0086077  | 0.570842872 | 1.06966 | 0.004030457 | 0.633108 | 0.244546 | 0.551334 | 1.109075 |
| 17.4188 | Glucose-1-phosphate           | 1.09568  | 0.00978275 | 0.709538535 | 1.23141 | 0.000445632 | 0.578732 | 0.779126 | 0.04698  | 0.815646 |
| 11.1604 | D-Glyceric acid               | 1.10128  | 0.01126714 | 1.581743319 | 1.08594 | 0.005218513 | 1.715624 | 0.276255 | 0.499379 | 1.084641 |
| 15.4537 | shikimic acid                 | 1.1466   | 0.0084628  | 1.591298441 | 1.04604 | 0.011966239 | 1.524341 | 0.192436 | 0.639802 | 0.957923 |
| 13.307  | oxalic acid                   | 1.18456  | 0.00494859 | 7.8769E-06  | 1.45075 | 4.58E-05    | 9E-06    | 0.169766 | 0.681415 | 1.142116 |
| 33.4768 | Analyte 426                   | 1.18627  | 0.00304657 | 0.354822042 | 1.13175 | 0.002547406 | 0.268819 | 0.443092 | 0.275398 | 0.757617 |
| 11.5011 | fumaric acid                  | 1.20119  | 0.00442361 | 1.555367492 | 1.32388 | 0.000560404 | 1.84778  | 0.767586 | 0.051078 | 1.188002 |
| 20.739  | Dihydroxyacetone              | 1.23326  | 0.00475203 | 6.068147497 | 1.28467 | 0.001831222 | 127.1998 | 0.734822 | 0.075669 | 20.96189 |
| 23.1448 | Linoleic acid methyl ester    | 1.23658  | 0.00251727 | 1.506220228 | 1.23907 | 0.000742294 | 1.651242 | 0.33388  | 0.412701 | 1.096282 |
| 16.2662 | 2,2-Dimethylsuccinic Acid     | 1.25E+00 | 0.00177452 | 1.542572695 | 1.31311 | 0.000552964 | 1.651539 | 0.285964 | 0.486645 | 1.070639 |
| 10.8128 | malonic acid 1                | 1.26E+00 | 0.00214812 | 1.673708686 | 1.07093 | 0.004124402 | 3.292968 | 0.684658 | 0.09545  | 1.967468 |
| 8.66405 | Maleimide                     | 1.30844  | 0.00054669 | 3.385992938 | 1.11326 | 0.004484672 | 1.867256 | 0.803081 | 0.045772 | 0.551465 |
| 30.4418 | Lactobionic Acid 1            | 1.34654  | 0.00037517 | 1.985904259 | 1.12205 | 0.003066103 | 4.653005 | 0.54428  | 0.181815 | 2.343016 |
| 20.2773 | Methyl Palmitoleate           | 1.35E+00 | 0.00084204 | 1.53523943  | 1.25111 | 0.00043247  | 1.645107 | 0.266513 | 0.5155   | 1.071564 |
| 25.1783 | Threitol                      | 1.35E+00 | 0.00093195 | 1.797476309 | 1.1986  | 0.002508092 | 1.64913  | 0.408836 | 0.31462  | 0.91747  |
| 24.2136 | Linoleic acid methyl ester    | 1.36E+00 | 0.00083188 | 1.782900463 | 1.01023 | 0.009939452 | 1.434117 | 0.688109 | 0.081384 | 0.804373 |
| 18.3135 | mucic acid                    | 1.37442  | 0.00047036 | 1.616048616 | 1.30462 | 0.000240513 | 1.704298 | 0.200898 | 0.624234 | 1.054608 |
| 20.7043 | coniferyl alcohol             | 1.39E+00 | 0.0003522  | 0.437132149 | 1.45511 | 5.12E-06    | 0.32579  | 0.993353 | 0.007825 | 0.745289 |
| 25.3544 | beta-Mannosylglycerate 1      | 1.39E+00 | 0.00016435 | 0.506301821 | 1.12079 | 0.002573006 | 0.439961 | 0.313736 | 0.445203 | 0.868971 |
| 9.52459 | Norleucine 2                  | 1.40215  | 0.0002195  | 2.882999006 | 1.14581 | 0.004669343 | 1.877909 | 0.915695 | 0.019798 | 0.651373 |
| 25.0877 | Androstanediol                | 1.41244  | 0.00010365 | 3.09565194  | 1.13231 | 0.001564539 | 2.320197 | 0.287651 | 0.481749 | 0.749502 |
| 18.894  | glucuronic acid 2             | 1.47291  | 0.00039468 | 6.213288888 | 1.42932 | 0.00016573  | 20.88125 | 0.763979 | 0.051139 | 3.36074  |
| 23.3911 | Methyl Palmitoleate           | 1.48323  | 8.49E-05   | 1.789344948 | 1.27975 | 0.000259016 | 1.671504 | 0.238707 | 0.56032  | 0.934143 |
| 31.0634 | Monoolein                     | 1.48937  | 0.00011417 | 1.521581522 | 1.33072 | 0.000206153 | 1.475279 | 0.215614 | 0.598912 | 0.96957  |
| 31.4025 | malonic acid 1                | 1.53232  | 2.33E-05   | 0.677084838 | 1.06166 | 0.004161411 | 0.838224 | 0.977316 | 0.00921  | 1.23799  |
| 19.4509 | N-Acetyl-beta-D-mannosamine 2 | 1.54311  | 0.00015971 | 18.7254757  | 1.44169 | 0.000144868 | 35.31879 | 0.219532 | 0.59257  | 1.886136 |
| 11.5696 | serine 1                      | 1.55E+00 | 0.00010158 | 2.11492903  | 1.44808 | 3.23E-05    | 2.335774 | 0.472031 | 0.243548 | 1.104422 |

|         |                            |          |            |             |                        |             |          |                      |          |          |
|---------|----------------------------|----------|------------|-------------|------------------------|-------------|----------|----------------------|----------|----------|
| 14.6164 | conduritol b epoxide 1     | 1.56E+00 | 6.68E-06   | 4.484487246 | 1.32999                | 6.94E-05    | 2.444073 | 0.61816 <sub>8</sub> | 0.120278 | 0.545006 |
| 20.6378 | tyrosine 1                 | 1.56697  | 3.39E-05   | 2.351600637 | 1.21203                | 0.000968884 | 1.742694 | 0.96681 <sub>6</sub> | 0.010756 | 0.741067 |
| 28.3005 | beta-Mannosylglycerate 2   | 1.57E+00 | 4.46E-05   | 1.844547037 | 1.49979                | 5.11E-06    | 2.158626 | 0.8292               | 0.03231  | 1.170274 |
| 15.646  | phenylalanine 1            | 1.63E+00 | 1.00E-05   | 2.15763739  | 1.43282                | 1.44E-05    | 2.001156 | 0.35016 <sub>4</sub> | 0.391975 | 0.927476 |
| 30.7118 | Monoolein                  | 1.63374  | 2.80E-07   | 4.796244233 | 1.49466                | 1.44E-06    | 3.010038 | 0.64286 <sub>7</sub> | 0.106734 | 0.627582 |
| 24.6284 | Galactinol 3               | 1.63967  | 2.89E-07   | 7.208434669 | 1.29534                | 0.000191466 | 2.710716 | 0.55219 <sub>4</sub> | 0.169684 | 0.376048 |
| 10.7963 | Isoleucine                 | 1.64E+00 | 9.19E-06   | 2.768184725 | 1.51926                | 2.82E-05    | 2.585397 | 0.40706              | 0.320455 | 0.933968 |
| 28.5472 | 1-Monopalmitin             | 1.70E+00 | 1.77E-06   | 2.571421716 | 1.5909                 | 1.31E-06    | 2.809125 | 0.67674 <sub>9</sub> | 0.087057 | 1.092441 |
| 9.8543  | valine                     | 1.70707  | 2.83E-06   | 3.278162573 | 1.57943                | 3.20E-06    | 3.336878 | 0.11306 <sub>2</sub> | 0.783367 | 1.017911 |
| 31.5851 | beta-Mannosylglycerate 1   | 1.67794  | 5.24E-07   | 0.441363467 | 0.702154               | 0.077611067 | 0.274553 | 0.40244 <sub>8</sub> | 0.333989 | 0.622056 |
| 26.9392 | Linoleic acid methyl ester | 1.47721  | 0.00071183 | 67387.38291 | 0.397226               | 0.319233711 | 0.392984 | 0.61449 <sub>4</sub> | 0.139501 | 5.83E-06 |
| 34.2067 | shikimic acid              | 1.45682  | 0.00017368 | 0.463374058 | 0.638828               | 0.108692106 | 0.362449 | 0.23623 <sub>1</sub> | 0.570176 | 0.782196 |
| 29.832  | xylitol                    | 1.38E+00 | 0.0002334  | 2.307519835 | 0.269831               | 0.499015821 | 1.372717 | 0.47811 <sub>3</sub> | 0.245099 | 0.594888 |
| 21.3934 | isocitric acid 2           | 1.33403  | 0.00113882 | 1.540900361 | 0.366352               | 0.364522644 | 1.151034 | 0.79559 <sub>8</sub> | 0.048196 | 0.746988 |
| 28.0328 | 2-Monoolein                | 1.31E+00 | 0.0013555  | 2.710829685 | 0.486404               | 0.229377973 | 1.337412 | 0.84856 <sub>4</sub> | 0.031593 | 0.493359 |
| 12.0893 | 22-Ketocholesterol         | 1.29854  | 0.00097073 | 0.333614867 | 0.18025                | 0.65909952  | 0.724331 | 0.98738 <sub>4</sub> | 0.009888 | 2.171159 |
| 12.9037 | fucose 1                   | 1.27694  | 0.00235893 | 0.371716041 | 0.8938                 | 0.019209107 | 0.309203 | 0.28290 <sub>3</sub> | 0.495676 | 0.831825 |
| 24.0025 | beta-Mannosylglycerate 1   | 1.27E+00 | 0.00230367 | 2.507318332 | 0.552013               | 0.171499153 | 1.328785 | 0.76161 <sub>2</sub> | 0.055924 | 0.529963 |
| 30.6436 | Lactobionic Acid 1         | 1.27202  | 0.0010497  | 1.476899238 | 0.56684                | 0.154547526 | 0.651754 | 0.81413              | 0.048022 | 0.441299 |
| 9.01093 | cycloleucine 1             | 1.22906  | 0.0022494  | 0.549399649 | 0.988706               | 0.008122564 | 0.701677 | 0.60726 <sub>1</sub> | 0.130301 | 1.27717  |
| 11.9577 | Methylmalonic acid         | 1.2004   | 0.00574713 | 0.496765927 | 0.651601               | 0.105995575 | 0.645612 | 0.59937 <sub>5</sub> | 0.139152 | 1.29963  |
| 16.7707 | Threitol                   | 1.16396  | 0.00638663 | 2.600389509 | 0.932201               | 0.024091313 | 1.916662 | 0.50584 <sub>3</sub> | 0.209438 | 0.737067 |
| 20.9699 | Glucose-1-phosphate        | 1.16309  | 0.00471881 | 0.156282093 | 0.924709               | 0.018154071 | 0.127834 | 0.21149 <sub>5</sub> | 0.607237 | 0.817968 |
| 10.5093 | Ethanolamine               | 1.10808  | 0.00923741 | 1.321583256 | 0.0036288 <sub>7</sub> | 0.992992283 | 1.036302 | 0.96927 <sub>7</sub> | 0.011979 | 0.784137 |
| 29.8614 | D-erythro-sphingosine 1    | 1.09387  | 0.00714385 | 0.638483445 | 0.995151               | 0.007871087 | 0.515781 | 0.43072 <sub>8</sub> | 0.292309 | 0.807823 |
| 24.7284 | cis-gondoic acid           | 1.06787  | 0.02271678 | 13.51946749 | 0.917928               | 0.032940423 | 6.307265 | 0.40076 <sub>2</sub> | 0.328384 | 0.466532 |
| 18.638  | 3,4-dihydroxybenzoic acid  | 1.06039  | 0.00920308 | 0.762640986 | 0.753298               | 0.05298224  | 0.7308   | 0.10903 <sub>9</sub> | 0.791908 | 0.958249 |
| 24.6826 | cis-gondoic acid           | 1.05745  | 0.01452262 | 0.42945853  | 0.770076               | 0.071448765 | 0.524049 | 0.64454 <sub>2</sub> | 0.107424 | 1.220256 |
| 29.2258 | beta-Mannosylglycerate 2   | 1.05E+00 | 0.01157183 | 0.826590563 | 0.566245               | 0.165480064 | 0.93503  | 0.59113 <sub>6</sub> | 0.138438 | 1.131188 |
| 21.8319 | malonic acid 1             | 1.04888  | 0.00966449 | 1.83297795  | 0.133062               | 0.740072049 | 0.821682 | 0.74331 <sub>9</sub> | 0.062032 | 0.448277 |
| 15.0594 | Glucose-1-phosphate        | 1.03926  | 0.0246798  | 2.460289871 | 0.347039               | 0.385709626 | 0.683955 | 0.80097 <sub>4</sub> | 0.052144 | 0.277998 |
| 20.6532 | ascorbate                  | 1.03116  | 0.01778891 | 1.838265269 | 0.167913               | 0.677863798 | 1.211797 | 0.49192 <sub>6</sub> | 0.232576 | 0.659207 |
| 32.9689 | Galactinol 1               | 1.02E+00 | 0.01603559 | 0.621553196 | 0.873035               | 0.02415806  | 1.011609 | 0.67478 <sub>7</sub> | 0.097044 | 1.62755  |

|         |                                |          |            |             |           |             |          |          |          |          |
|---------|--------------------------------|----------|------------|-------------|-----------|-------------|----------|----------|----------|----------|
| 16.6802 | ribitol                        | 1.00891  | 0.01475694 | 0.272260177 | 0.298368  | 0.456029983 | 0.399813 | 0.261371 | 0.527381 | 1.468496 |
| 13.2787 | glutamine 3                    | 1.00058  | 0.03074937 | 8.018095247 | 0.929707  | 0.029799519 | 8.431703 | 0.021094 | 0.959117 | 1.051584 |
| 9.61065 | oxalic acid                    | 0.991803 | 0.03005245 | 5.494022594 | 0.950528  | 0.025132254 | 6.511097 | 0.094141 | 0.819012 | 1.185124 |
| 10.076  | N-(3-aminopropyl)-morpholine 2 | 0.977866 | 0.03373546 | 6.968537764 | 0.987027  | 0.02009309  | 16.10489 | 0.332758 | 0.414706 | 2.311085 |
| 18.9427 | Dehydroascorbic Acid 2         | 9.72E-01 | 0.03367597 | 3.416279507 | 0.136971  | 0.73741998  | 0.777364 | 0.836144 | 0.039866 | 0.227547 |
| 19.3525 | Tagatose 1                     | 9.50E-01 | 0.02363423 | 3.182300128 | 0.937763  | 0.014542766 | 3.957303 | 0.084794 | 0.836656 | 1.243535 |
| 8.48201 | 2-Butyne-1,4-diol              | 9.48E-01 | 0.045435   | 10.07285972 | 0.842838  | 0.049693527 | 8.871339 | 0.045364 | 0.912924 | 0.880717 |
| 26.1229 | Threitol                       | 9.16E-01 | 0.04080818 | 1.54879975  | 0.174558  | 0.676407013 | 1.102886 | 0.758703 | 0.055669 | 0.712091 |
| 23.6056 | 2-Monoolein                    | 0.899027 | 0.03278078 | 1.529690001 | 0.145935  | 0.717430636 | 1.074345 | 0.447235 | 0.273864 | 0.702329 |
| 10.6752 | thymidine 3                    | 0.883229 | 0.05428264 | 1.324208951 | 0.239379  | 0.560614201 | 1.09441  | 0.50364  | 0.220733 | 0.826463 |
| 9.33708 | 4-HYDROXYPYRIDINE              | 8.80E-01 | 0.03686953 | 1.950331365 | 0.521898  | 0.196109665 | 1.494375 | 0.34745  | 0.393596 | 0.766216 |
| 17.8392 | 3,6-Anhydro-D-galactose 2      | 0.867335 | 0.05179989 | 2.024040402 | 0.398874  | 0.327205271 | 1.532213 | 0.314924 | 0.443987 | 0.757007 |
| 14.3115 | Prostaglandin E2 2             | 0.824242 | 0.06745214 | 4.815306829 | 0.140703  | 0.738025959 | 1.100322 | 0.976423 | 0.010299 | 0.228505 |
| 29.9568 | Tagatose 1                     | 0.818354 | 0.05191688 | 4.164358027 | 0.488314  | 0.224423937 | 1.941637 | 0.340502 | 0.40345  | 0.466251 |
| 27.3209 | lactose 1                      | 8.03E-01 | 0.07945546 | 0.763151959 | 0.855903  | 0.025280471 | 0.526615 | 0.599766 | 0.145407 | 0.690053 |
| 37.9128 | Galactinol 3                   | 0.803187 | 0.05790108 | 0.871649641 | 0.706349  | 0.07165224  | 0.796084 | 0.298582 | 0.468277 | 0.913307 |
| 26.4567 | Tagatose 1                     | 0.797501 | 0.05900983 | 1.217705832 | 0.164125  | 0.682529844 | 0.986411 | 0.669237 | 0.091315 | 0.810057 |
| 23.0188 | myo-inositol                   | 0.776585 | 0.07934242 | 0.881252651 | 0.0994779 | 0.806301977 | 0.977553 | 0.412303 | 0.31607  | 1.109276 |
| 16.5485 | Ribonic acid, gamma-lactone    | 0.759672 | 0.07661768 | 0.850404986 | 0.935968  | 0.01320789  | 0.772685 | 0.387088 | 0.340764 | 0.908608 |
| 26.3769 | fructose 2                     | 0.74946  | 0.07803036 | 1.226131815 | 0.750667  | 0.053520164 | 1.350109 | 0.238813 | 0.56061  | 1.101113 |
| 23.6844 | 5-alpha-Dihydroprogesterone 2  | 0.742266 | 0.10461771 | 4.72703645  | 0.092847  | 0.82913489  | 1.004948 | 0.847736 | 0.027737 | 0.212596 |
| 29.3555 | 2-Monoolein                    | 0.716652 | 0.09228551 | 0.668782448 | 0.198461  | 0.619513091 | 1.411309 | 0.554618 | 0.170869 | 2.110266 |
| 22.1797 | oxalic acid                    | 0.712356 | 0.09457234 | 0.715502357 | 0.4353    | 0.284733994 | 0.795414 | 0.342659 | 0.401395 | 1.111687 |
| 25.0688 | Glucose-1-phosphate            | 7.06E-01 | 0.11423641 | 1.492203681 | 0.192518  | 0.637920022 | 1.267312 | 0.358073 | 0.382791 | 0.849289 |
| 25.7316 | beta-Mannosylglycerate 1       | 0.700966 | 0.10139823 | 1.993341371 | 0.813679  | 0.040242333 | 0.175737 | 0.818481 | 0.047444 | 0.088162 |
| 22.94   | conduritol b epoxide 2         | 6.98E-01 | 0.10751942 | 0.497316938 | 0.236287  | 0.576270105 | 1.709715 | 0.900393 | 0.019008 | 3.437878 |
| 20.4278 | glucuronic acid 3              | 0.694341 | 0.11171857 | 1.223115212 | 0.465999  | 0.244690018 | 0.927185 | 0.898226 | 0.020421 | 0.758052 |
| 19.2152 | quinic acid                    | 0.687765 | 0.12381704 | 3.15119397  | 0.552097  | 0.183284423 | 2.506795 | 0.11758  | 0.774835 | 0.795506 |
| 15.3851 | flavin adenine degrad product  | 0.66949  | 0.15260097 | 1.420033645 | 0.564277  | 0.17258431  | 1.456331 | 0.054232 | 0.895669 | 1.025561 |
| 26.372  | Galactinol 3                   | 6.62E-01 | 0.14833945 | 3.255892462 | 0.408686  | 0.314150252 | 0.578681 | 0.918562 | 0.019838 | 0.177733 |
| 12.9006 | Diglycerol 2                   | 0.648241 | 0.16032011 | 2.703862761 | 0.153152  | 0.705011696 | 1.582933 | 0.206586 | 0.61902  | 0.585434 |
| 8.59009 | Analyte 14                     | 0.631418 | 0.14143767 | 0.313463958 | 0.0797406 | 0.849818001 | 1.078843 | 0.674507 | 0.093045 | 3.44168  |
| 10.2694 | 4-Hydroxyphenylethanol         | 6.21E-01 | 0.1869173  | 1.360978181 | 0.567037  | 0.185238419 | 1.370466 | 0.033472 | 0.935229 | 1.006971 |

|         |                                  |          |            |              |           |             |          |          |          |          |
|---------|----------------------------------|----------|------------|--------------|-----------|-------------|----------|----------|----------|----------|
| 13.4095 | L-Malic acid                     | 0.620257 | 0.15111145 | 0.033906006  | 0.332394  | 0.404614397 | 0.114708 | 0.407259 | 0.320566 | 3.383124 |
| 17.0185 | MALONAMIDE 5                     | 0.615575 | 0.16980323 | 2.038654405  | 0.371443  | 0.37293856  | 1.477697 | 0.23462  | 0.566852 | 0.724839 |
| 15.0466 | 2-Monopalmitin                   | 0.610534 | 0.1604665  | 1.63243271   | 0.833166  | 0.030417875 | 3.701396 | 0.370426 | 0.362444 | 2.267411 |
| 12.7293 | malonic acid 1                   | 0.609686 | 0.15548479 | 1.857315136  | 0.446665  | 0.301753844 | 0.935892 | 0.829215 | 0.042195 | 0.503895 |
| 13.5196 | L-Malic acid                     | 0.607761 | 0.15956353 | 0.020197004  | 0.398339  | 0.317950417 | 0.066352 | 0.392326 | 0.34009  | 3.285215 |
| 32.2212 | Epicatechin                      | 0.586147 | 0.1850495  | 1.687267701  | 0.366359  | 0.365417343 | 0.647011 | 0.781465 | 0.046646 | 0.383467 |
| 15.2818 | glutamic acid                    | 5.78E-01 | 0.18512638 | 1.516233846  | 0.120575  | 0.780381866 | 1.108441 | 0.733072 | 0.068092 | 0.731049 |
| 13.9112 | lactic acid                      | 0.566676 | 0.21779722 | 1.282578134  | 0.058977  | 0.890326548 | 1.107765 | 0.623339 | 0.117208 | 0.863702 |
| 16.4343 | Diglycerol 2                     | 5.40E-01 | 0.26302899 | 13.26610731  | 0.410687  | 0.356609496 | 3.871398 | 0.85186  | 0.028945 | 0.291826 |
| 11.8735 | cycloleucine 1                   | 0.519746 | 0.26487087 | 1.132092881  | 0.904306  | 0.021008271 | 1.445033 | 0.809056 | 0.039923 | 1.276427 |
| 26.0748 | N-epsilon-Acetyl-L-lysine 1      | 0.514822 | 0.26342595 | 1.366508502  | 0.236382  | 0.58566898  | 0.94436  | 0.957495 | 0.011156 | 0.691075 |
| 16.5558 | 3,6-Anhydro-D-galactose 2        | 5.14E-01 | 0.24622884 | 0.727866992  | 0.957004  | 0.011636092 | 0.488036 | 0.652749 | 0.099295 | 0.670502 |
| 12.0819 | malonic acid 1                   | 0.507945 | 0.27626924 | 1.419196193  | 0.928149  | 0.01703244  | 3.544314 | 0.856924 | 0.028741 | 2.497409 |
| 17.9573 | 2-Deoxytetronic acid             | 0.502618 | 0.26388759 | 1.255835191  | 0.165538  | 0.680687505 | 1.165393 | 0.083184 | 0.841107 | 0.927982 |
| 20.0629 | myo-inositol                     | 0.495525 | 0.25079063 | 0.348676947  | 0.440055  | 0.269799742 | 0.124368 | 0.341679 | 0.41059  | 0.356686 |
| 13.5748 | glycine 1                        | 0.494696 | 0.25214568 | 0.120091025  | 0.336894  | 0.405896741 | 0.428823 | 0.39742  | 0.338723 | 3.570813 |
| 18.816  | Allo-inositol                    | 0.484522 | 0.26858314 | 1.168777206  | 0.283822  | 0.477655829 | 0.805775 | 0.491684 | 0.230947 | 0.689417 |
| 10.2007 | 3-hydroxypyruvate                | 0.475438 | 0.2839966  | 0.8679433580 | 0.0917531 | 0.833476101 | 1.047408 | 0.648892 | 0.109598 | 1.20677  |
| 26.6112 | cytidine-monophosphate degr prod | 0.469259 | 0.31931971 | 1.3285898570 | 0.0726954 | 0.862485018 | 1.005371 | 0.576069 | 0.157197 | 0.75672  |
| 14.7398 | Glucose-1-phosphate              | 0.459271 | 0.30409568 | 1.262870255  | 0.462366  | 0.245477717 | 2.367075 | 0.34     | 0.412652 | 1.874361 |
| 34.8666 | 3-Phenyllactic acid              | 0.448352 | 0.32332993 | 1.14692811   | 0.645137  | 0.139853162 | 1.201418 | 0.238157 | 0.565336 | 1.047509 |
| 30.3167 | cellobiose 2                     | 4.48E-01 | 0.31142335 | 1.194435296  | 0.571764  | 0.14985131  | 0.792863 | 0.840668 | 0.030286 | 0.663798 |
| 8.14825 | Analyte 5                        | 0.443996 | 0.3081344  | 0.876707493  | 0.529399  | 0.199427369 | 5.039431 | 0.782448 | 0.049051 | 5.748133 |
| 17.4465 | MALONAMIDE 5                     | 4.44E-01 | 0.33197747 | 1.516025048  | 0.187898  | 0.651990344 | 1.146506 | 0.213602 | 0.603069 | 0.756258 |
| 11.2441 | nicotinic acid                   | 0.439219 | 0.34094844 | 1.34403381   | 0.497078  | 0.251915228 | 1.380592 | 0.101537 | 0.805412 | 1.0272   |
| 29.5274 | fructose 1                       | 0.433435 | 0.31595306 | 0.716723466  | 0.619682  | 0.115972817 | 1.301945 | 0.551132 | 0.182807 | 1.816523 |
| 13.1786 | Methylmalonic acid               | 0.408858 | 0.34424329 | 0.00669034   | 0.397518  | 0.318952222 | 0.024401 | 0.283596 | 0.494607 | 3.647146 |
| 24.0883 | Phytol                           | 4.07E-01 | 0.36707963 | 1.451193484  | 0.480451  | 0.228133146 | 0.840068 | 0.721245 | 0.072748 | 0.578881 |
| 22.985  | myo-inositol                     | 3.88E-01 | 0.3784258  | 0.603954589  | 0.534957  | 0.178782679 | 0.479514 | 0.234103 | 0.56795  | 0.793957 |
| 17.7438 | creatine degr                    | 3.82E-01 | 0.41279624 | 1.171209138  | 0.22888   | 0.592265346 | 0.945242 | 0.772802 | 0.047798 | 0.807065 |
| 32.6047 | Epicatechin                      | 0.377422 | 0.3973852  | 1.016459511  | 0.158149  | 0.696352171 | 1.047234 | 0.099359 | 0.809659 | 1.030276 |
| 28.8321 | 2-Monoolein                      | 0.374521 | 0.43861682 | 3.630635605  | 0.242018  | 0.575374764 | 2.288972 | 0.154023 | 0.711749 | 0.63046  |
| 17.3715 | Diglycerol 2                     | 0.356486 | 0.43903553 | 0.948321001  | 0.101656  | 0.811685295 | 1.060218 | 0.546072 | 0.173096 | 1.117995 |
| 33.7096 | raffinose                        | 0.343539 | 0.42711225 | 0.893763475  | 0.399312  | 0.316626919 | 0.741058 | 0.197226 | 0.631998 | 0.829143 |

|         |                          |          |            |             |           |             |          |              |          |          |
|---------|--------------------------|----------|------------|-------------|-----------|-------------|----------|--------------|----------|----------|
| 15.8321 | Lyxose 1                 | 0.33703  | 0.4527282  | 1.049522316 | 0.886157  | 0.020183558 | 0.910593 | 0.72664<br>4 | 0.064684 | 0.867627 |
| 22.9955 | 2-Monoolein              | 0.335193 | 0.46990382 | 1.507746204 | 0.661509  | 0.127740423 | 5.21899  | 0.56792<br>8 | 0.161124 | 3.461452 |
| 21.3902 | 2-Hydroxyvaleric acid    | 0.299484 | 0.49541794 | 0.652820216 | 0.448567  | 0.310034672 | 5.704983 | 0.61475<br>2 | 0.138033 | 8.73898  |
| 24.233  | Turanose 2               | 2.88E-01 | 0.52976986 | 0.895364158 | 0.291935  | 0.487730452 | 1.22215  | 0.64232<br>9 | 0.105352 | 1.364975 |
| 12.158  | Analyte 80               | 0.268844 | 0.5555686  | 1.205513296 | 0.53866   | 0.204788476 | 1.38654  | 0.34105<br>9 | 0.404037 | 1.150166 |
| 9.9618  | L-Threose 1              | 0.253663 | 0.5981273  | 1.857975482 | 0.373504  | 0.379060386 | 0.868558 | 0.91317<br>8 | 0.02278  | 0.467476 |
| 24.557  | aspartic acid 2          | 0.237975 | 0.5926497  | 0.992252288 | 0.870431  | 0.029338403 | 1.539551 | 0.96404<br>8 | 0.012144 | 1.551573 |
| 25.3283 | Dehydroepiandrosterone   | 2.22E-01 | 0.61290203 | 0.957380128 | 0.265426  | 0.515135857 | 1.187587 | 0.39545<br>4 | 0.330989 | 1.240455 |
| 19.1288 | quinic acid              | 1.97E-01 | 0.65734202 | 1.31395482  | 0.287947  | 0.518462203 | 1.313138 | 0.0012       | 0.997705 | 0.999378 |
| 17.621  | 2-Deoxyerythritol        | 0.197047 | 0.65728138 | 1.013936364 | 0.790811  | 0.042668974 | 0.32213  | 0.72890<br>4 | 0.069926 | 0.317702 |
| 19.4677 | Lyxose 2                 | 0.181612 | 0.68359593 | 0.757341511 | 0.0386115 | 0.924527441 | 0.855942 | 0.10199<br>5 | 0.804232 | 1.130193 |
| 29.0045 | sucrose                  | 1.79E-01 | 0.70389441 | 0.78893569  | 0.150225  | 0.720107047 | 1.065689 | 0.38752<br>1 | 0.344385 | 1.350793 |
| 10.8372 | threonine 2              | 1.74E-01 | 0.69751891 | 1.02009548  | 0.647716  | 0.102004551 | 0.518683 | 0.62853<br>6 | 0.126859 | 0.508465 |
| 9.22394 | p-cresol                 | 0.17295  | 0.70353695 | 1.409801339 | 0.479882  | 0.26967312  | 0.852988 | 0.72961<br>1 | 0.070228 | 0.605041 |
| 20.959  | beta-Mannosylglycerate 1 | 1.69E-01 | 0.70315716 | 0.786495794 | 0.523903  | 0.188741224 | 0.14695  | 0.52666      | 0.205241 | 0.186842 |
| 23.4071 | glucose 2                | 0.167569 | 0.70681159 | 0.994862506 | 0.350805  | 0.381970256 | 1.239506 | 0.44912<br>3 | 0.269382 | 1.245907 |
| 30.1755 | 2-Monoolein              | 0.161264 | 0.72074716 | 1.323217376 | 0.340069  | 0.404438808 | 0.646794 | 0.47912<br>7 | 0.235545 | 0.488804 |
| 19.4666 | fructose 1               | 0.149895 | 0.73708757 | 0.728782768 | 0.211628  | 0.608794521 | 0.671739 | 0.06217<br>1 | 0.879894 | 0.921728 |
| 11.0543 | succinic acid            | 1.47E-01 | 0.74934741 | 0.988365221 | 0.167729  | 0.692233916 | 1.043845 | 0.36543<br>4 | 0.369017 | 1.056133 |
| 25.6183 | creatine degr            | 0.145371 | 0.76129233 | 1.113345743 | 0.433546  | 0.315985227 | 0.852191 | 0.99815<br>1 | 0.008314 | 0.765432 |
| 11.0339 | glycine 2                | 1.43E-01 | 0.75508909 | 1.013298876 | 0.598244  | 0.138827748 | 0.904063 | 0.57733<br>8 | 0.149543 | 0.892198 |
| 16.0642 | Glucose-1-phosphate      | 0.137137 | 0.76863393 | 1.100914501 | 0.433723  | 0.283120788 | 0.466985 | 0.60076      | 0.139308 | 0.424179 |
| 17.6911 | Galactonic acid          | 0.13667  | 0.77222461 | 0.860372715 | 0.279811  | 0.495007048 | 0.784053 | 0.24523<br>9 | 0.553383 | 0.911294 |
| 18.5355 | fucose 2                 | 0.101468 | 0.82756788 | 1.062778555 | 0.719661  | 0.078663614 | 1.321714 | 0.84402<br>4 | 0.028493 | 1.243641 |
| 8.262   | oxalic acid              | 9.90E-02 | 0.821488   | 0.999584928 | 0.803156  | 0.041086976 | 2.438592 | 0.50504<br>6 | 0.214898 | 2.439605 |
| 19.6895 | galactose 1              | 9.08E-02 | 0.83590345 | 1.082021063 | 0.859326  | 0.029861487 | 0.140145 | 0.88385      | 0.031307 | 0.129522 |
| 18.1714 | xylitol                  | 4.36E-02 | 0.92173818 | 0.964010547 | 0.407962  | 0.306228379 | 0.233589 | 0.43135<br>3 | 0.298662 | 0.24231  |
| 14.7195 | 2-Deoxyerythritol        | 0.028304 | 0.950941   | 0.879978725 | 0.229985  | 0.564591502 | 0.496798 | 0.23598<br>7 | 0.571018 | 0.564557 |
| 23.4954 | glucose 2                | 0.01723  | 0.96920149 | 1.044041751 | 0.455159  | 0.254104026 | 1.310432 | 0.43908<br>6 | 0.280302 | 1.255153 |
| 18.7332 | isocitric acid 2         | 0.016724 | 0.97156188 | 1.299012822 | 0.461431  | 0.280251985 | 2.668975 | 0.70493<br>3 | 0.073047 | 2.054618 |
| 19.1628 | quinic acid              | 1.28E-02 | 0.97674168 | 0.936714227 | 0.84936   | 0.032019728 | 7.64E-05 | 0.88294      | 0.032019 | 8.16E-05 |



Table S2. 142 metabolites varied among the three groups.

|    | RT          | Names                                | PubChem | KEGG   | Relative<br>Contents<br>(N) | Relative<br>Contents<br>(O) | Relative<br>Contents<br>(T) | VIP          | p-value      | FC(T/O)  | VIP         | p-value  | FC (T/N) | VIP         | p-value  | FC(O/N)  |
|----|-------------|--------------------------------------|---------|--------|-----------------------------|-----------------------------|-----------------------------|--------------|--------------|----------|-------------|----------|----------|-------------|----------|----------|
| 1  | 15.217<br>3 | (+)-<br>Dihydroc<br>arveol<br>1,5-   |         |        | 2.607771                    | 2.2E-05                     | 2.320482                    | 1.666<br>15  | 2.72E-<br>05 | 105338.1 | N           | N        | N        | 1.6655<br>7 | 5.82E-08 | 8.45E-06 |
| 2  | 10.815      | Anhydrogl<br>ucitol<br>1-            | 64960   | C07326 | 26.92387                    | 1.72397<br>6                | 3.905063                    | N            | N            | N        | 1.5193<br>1 | 5.53E-07 | 0.145041 | 1.6342<br>7 | 4.91E-10 | 0.064032 |
| 3  | 14.341<br>1 | Hydroxya<br>nthraquino<br>ne 1<br>1- |         |        | 3.516376                    | 4.57345<br>8                | 6.093776                    | N            | N            | N        | 1.1904<br>2 | 0.003502 | 1.732971 | 1.0361<br>5 | 0.006514 | 1.300617 |
| 4  | 28.547<br>2 | Monopalmitin<br>2,2-                 |         |        | 4.057147                    | 4.43219<br>2                | 11.39703                    | 1.70E<br>+00 | 1.77E-<br>06 | 2.571422 | 1.5909      | 1.31E-06 | 2.809125 | N           | N        | N        |
| 5  | 16.266<br>2 | Dimethylsuccinic<br>Acid<br>22-      | 11701   |        | 67.45561                    | 72.2206<br>3                | 111.4056                    | 1.25E<br>+00 | 0.00177<br>5 | 1.542573 | 1.3131<br>1 | 0.000553 | 1.651539 | N           | N        | N        |
| 6  | 12.089<br>3 | Ketocholesterol<br>2-                | 91474   |        | 1.409354                    | 3.05993<br>2                | 1.020839                    | 1.298<br>54  | 0.00097<br>1 | 0.333615 | N           | N        | N        | N           | N        | N        |
| 7  | 10.648<br>8 | Deoxyerythritol<br>2-                |         |        | 3.714874                    | 1.16495                     | 4.625451                    | 1.616<br>33  | 3.50E-<br>05 | 3.970516 | N           | N        | N        | 1.6273<br>5 | 7.88E-10 | 0.313591 |
| 8  | 27.082<br>2 | hydroxybutanoic acid<br>2-           | 11266   | C05984 | 25.51174                    | 9.66399<br>9                | 8.692246                    | N            | N            | N        | 1.1807<br>1 | 0.001118 | 0.340715 | 1.1293<br>8 | 0.002452 | 0.378806 |
| 9  | 8.0549<br>9 | hydroxyproline<br>2-                 | 72924   | C01020 | 26.74934                    | 62.4535<br>7                | 59.84257                    | N            | N            | N        | 1.0583<br>8 | 6.33E-03 | 2.23716  | 1.3467<br>2 | 4.85E-05 | 2.33477  |
| 10 | 20.033<br>7 | 2-Keto-L-gulonic<br>acid             | 440390  |        | 1.41E-05                    | 3.10997<br>5                | 1.157918                    | 1.193<br>02  | 0.00811      | 0.372324 | N           | N        | N        | 1.6929<br>5 | 2.78E-09 | 220646.7 |
| 11 | 24.133<br>7 | 2-Monoolein<br>3,4-                  |         |        | 5.995023                    | 3.19296<br>7                | 10.08739                    | 1.50E<br>+00 | 0.00032<br>2 | 3.159254 | 1.0075<br>9 | 0.010305 | 1.682628 | 1.0928<br>2 | 0.004162 | 0.532603 |
| 12 | 18.638      | dihydroxybenzoic<br>acid<br>3,6-     |         |        | 8.281953                    | 7.93617<br>3                | 6.052451                    | 1.060<br>39  | 0.00920<br>3 | 0.762641 | N           | N        | N        | N           | N        | N        |
| 13 | 14.589<br>1 | Anhydro-D-galactose<br>1<br>3-       |         | C06474 | 7.185193                    | 2.48792<br>8                | 1.580084                    | N            | N            | N        | 1.4593<br>8 | 1.96E-05 | 0.219908 | 1.4296<br>6 | 6.02E-05 | 0.346258 |
| 14 | 24.967<br>3 | Hydroxyornithine<br>2<br>3-          |         |        | 117.8278                    | 78.4553<br>6                | 65.94529                    | N            | N            | N        | 1.0691<br>3 | 0.003448 | 0.559675 | N           | N        | N        |
| 15 | 36.681      | Hydroxypropionic<br>acid 1<br>3-     | 68152   | C01013 | 1.924535                    | 19.5080<br>6                | 10.47345                    | N            | N            | N        | 1.4208<br>8 | 8.67E-06 | 5.442066 | 1.4236<br>2 | 5.26E-05 | 10.13651 |
| 16 | 12.571<br>8 | Methylthiopropylamine<br>4-          |         |        | 17.09075                    | 25.0591<br>9                | 26.06645                    | N            | N            | N        | 1.3593<br>9 | 4.93E-04 | 1.525179 | 1.5159<br>8 | 7.69E-06 | 1.466243 |
| 17 | 14.099<br>9 | aminobutyric acid 1                  | 12025   | C11118 | 361.931                     | 482.818                     | 1012.181                    | 1.588<br>44  | 4.63E-<br>05 | 2.096403 | 1.5310<br>9 | 5.27E-06 | 2.796614 | 1.1045<br>5 | 0.002357 | 1.334006 |

|    |             |                                     |         |        |          |              |          |              |              |          |             |          |          |             |          |          |
|----|-------------|-------------------------------------|---------|--------|----------|--------------|----------|--------------|--------------|----------|-------------|----------|----------|-------------|----------|----------|
| 18 | 9.2486<br>9 | 4-aminobutyric acid 3               | 12025   | C11118 | 13.47363 | 19.6908<br>4 | 41.97504 | 1.609<br>11  | 3.15E-05     | 2.131704 | 1.5602<br>4 | 2.75E-06 | 3.115348 | 1.3150<br>6 | 8.95E-05 | 1.461435 |
| 19 | 9.2966<br>2 | 4-Androsten-11beta-ol-3,17-dione 1  |         | C05284 | 0.55067  | 3.67381<br>4 | 3.878138 | N            | N            | N        | N           | N        | N        | 1.1995<br>7 | 0.001032 | 6.671533 |
| 20 | 29.246      | 4-nitrocatechol                     | 3505109 | C02235 | 6.447669 | 2.27832<br>1 | 0.299843 | N            | N            | N        | 1.3265<br>2 | 0.000212 | 0.046504 | N           | N        | N        |
| 21 | 10.445<br>6 | 4-Vinylphenol dimer                 |         | C05627 | 30.96525 | 67.9696<br>8 | 67.83964 | N            | N            | N        | 1.3582<br>7 | 9.58E-05 | 2.190831 | 1.5325<br>3 | 1.49E-07 | 2.195031 |
| 22 | 14.980<br>5 | 5-Dihydrocortisol 1                 | 164838  | C05471 | 2.285843 | 3.20833<br>3 | 4.849614 | N            | N            | N        | 1.0697<br>4 | 0.003736 | 2.121587 | N           | N        | N        |
| 23 | 28.342<br>7 | Acetol 1                            | 164838  | C05471 | 0.073388 | 0.28052<br>3 | 1.547463 | N            | N            | N        | 1.1165<br>8 | 0.007093 | 21.08607 | N           | N        | N        |
| 24 | 26.427<br>1 | Analyte 354                         | 8299    | C05235 | 42.92905 | 34.4293      | 27.24397 | 1.011<br>14  | 0.01613<br>7 | 0.791302 | 1.1926<br>6 | 0.000694 | 0.634628 | N           | N        | N        |
| 25 | 27.284<br>1 | Analyte 368                         |         |        | 6.476845 | 2.2E-05      | 5.013611 | 1.74E<br>+00 | 2.87E-06     | 227592.6 | 1.0177<br>7 | 6.45E-03 | 0.774082 | 1.6691<br>5 | 4.31E-08 | 3.4E-06  |
| 26 | 33.476<br>8 | Analyte 426                         |         |        | 50.41728 | 38.1969<br>6 | 13.55312 | 1.186<br>27  | 0.00304<br>7 | 0.354822 | 1.1317<br>5 | 0.002547 | 0.268819 | N           | N        | N        |
| 27 | 25.087<br>7 | Androstanediol                      | 441301  | C07632 | 0.930614 | 0.69749<br>7 | 2.159209 | 1.412<br>44  | 0.00010<br>4 | 3.095652 | 1.1323<br>1 | 0.001565 | 2.320197 | N           | N        | N        |
| 28 | 28.307<br>5 | arbutin                             |         | C06186 | 0.017975 | 0.81600<br>7 | 2.0204   | 1.225<br>96  | 0.00237<br>8 | 2.475961 | 1.6581<br>6 | 2.74E-08 | 112.401  | 1.0793<br>4 | 0.00765  | 45.39691 |
| 29 | 20.653<br>2 | ascorbate                           | 644104  | C00072 | 4.888771 | 3.22271<br>2 | 5.9242   | 1.031<br>16  | 0.01778<br>9 | 1.838265 | N           | N        | N        | N           | N        | N        |
| 30 | 13.062<br>2 | asparagine 5                        | 6267    | C00152 | 0.237961 | 8.35367<br>4 | 10.54475 | N            | N            | N        | 1.43560     | 0.000215 | 44.31293 | 1.4088<br>8 | 0.000171 | 35.10522 |
| 31 | 13.81       | aspartic acid 1                     | 83887   | C00402 | 57.56193 | 107.662<br>3 | 129.8358 | N            | N            | N        | 1.5119<br>5 | 4.17E-06 | 2.255584 | 1.5768<br>3 | 1.56E-08 | 1.870374 |
| 32 | 12.561<br>8 | aspartic acid 2                     |         | C00049 | 3.153632 | 4.67856<br>9 | 6.914781 | N            | N            | N        | 1.5257<br>9 | 2.74E-07 | 2.192641 | N           | N        | N        |
| 33 | 24.002<br>5 | beta-Mannosylglycerate 1            |         |        | 12.4809  | 6.61441<br>1 | 16.58443 | 1.27E<br>+00 | 0.00230<br>4 | 2.507318 | N           | N        | N        | N           | N        | N        |
| 34 | 28.300<br>5 | beta-Mannosylglycerate 2            |         |        | 68.37977 | 80.0231      | 147.6064 | 1.57E<br>+00 | 4.46E-05     | 1.844547 | 1.4997<br>9 | 5.11E-06 | 2.158626 | N           | N        | N        |
| 35 | 9.6662<br>9 | Biphenyl Carbobenz                  |         | C06588 | 2.64306  | 0.34606<br>6 | 6.217126 | 1.624<br>05  | 3.66E-06     | 17.96517 | 1.1883<br>4 | 0.001032 | 2.352245 | 1.1741<br>3 | 0.001064 | 0.130934 |
| 36 | 26.337<br>7 | xyloxy-L-leucine degr5              |         | C04335 | 1.27762  | 2.2E-05      | 0.217431 | N            | N            | N        | 1.3108<br>7 | 0.000194 | 0.170184 | 1.4319<br>6 | 0.000132 | 1.72E-05 |
| 37 | 12.253<br>3 | Carnitine                           |         | C00487 | 2.512566 | 0.96966<br>5 | 2.485326 | 1.46E<br>+00 | 0.00018<br>9 | 2.563078 | N           | N        | N        | 1.2655      | 0.000579 | 0.385926 |
| 38 | 13.393      | cis-1,2-Dihydronaphthalene-1,2-diol |         | C04314 | 1.41E-05 | 2.2E-05      | 2.893155 | 1.788<br>26  | 1.10E-07     | 131334.6 | 1.6500<br>2 | 1.10E-07 | 205263.7 | 1.5143<br>7 | 1.28E-05 | 1.562907 |
| 39 | 24.682<br>6 | cis-gondoic acid                    | 6438157 |        | 10.32328 | 12.5970<br>4 | 5.409907 | 1.057<br>45  | 0.01452<br>3 | 0.429459 | N           | N        | N        | N           | N        | N        |
| 40 | 11.220<br>4 | Citraconic acid degr1               |         |        | 8.361992 | 10.8744<br>2 | 11.82222 | N            | N            | N        | N           | N        | N        | 1.3065<br>9 | 0.000283 | 1.300459 |
| 41 | 18.468<br>5 | citric acid                         | 311     | C00158 | 11.37489 | 17.4461<br>3 | 3.168419 | 1.798<br>07  | 1.69E-13     | 0.181612 | 1.2859<br>5 | 0.000455 | 0.278545 | 1.1025<br>5 | 0.00472  | 1.53374  |
| 42 | 18.661<br>5 | citrulline 1                        | 9750    | C00327 | 17.0663  | 77.7454<br>7 | 163.7387 | 1.364<br>68  | 0.00098<br>6 | 2.106087 | 1.5245<br>1 | 2.66E-05 | 9.594272 | 1.4891<br>3 | 1.08E-05 | 4.555496 |
| 43 | 14.616<br>4 | conduritol b epoxide 1              |         |        | 1.272426 | 0.69348      | 3.109901 | 1.56E<br>+00 | 6.68E-06     | 4.484487 | 1.3299<br>9 | 6.94E-05 | 2.444073 | N           | N        | N        |

|    |             |                                 |          |        |                 |               |               |             |                 |                 |             |          |          |             |                 |                 |
|----|-------------|---------------------------------|----------|--------|-----------------|---------------|---------------|-------------|-----------------|-----------------|-------------|----------|----------|-------------|-----------------|-----------------|
| 44 | 15.519<br>5 | conduititol<br>b epoxide<br>2   |          |        | 1.426294        | 0.73504<br>8  | 0.35044       | 1.13E+00    | 0.00550<br>2    | 0.476758        | 1.4699      | 1.58E-06 | 0.2457   | 1.2713<br>9 | 0.000207        | 0.515355        |
| 45 | 20.704<br>3 | coniferyl<br>alcohol            |          | C00590 | 1.352264        | 1.00782<br>7  | 0.440554      | 1.39E+00    | 0.00035<br>2    | 0.437132        | 1.4551<br>1 | 5.12E-06 | 0.32579  | N           | N               | N               |
| 46 | 9.0109<br>3 | cycloleucin<br>e 1              |          | C03969 | 20.79575        | 26.5597       | 14.59189      | 1.229<br>06 | 0.00224<br>9    | 0.5494          | N           | N        | N        | N           | N               | N               |
| 47 | 17.477<br>5 | D-(glycerol<br>1-<br>phosphate) | 439162   | C00093 | 6.601468        | 1.08732<br>8  | 7.362986      | 1.457<br>08 | 0.0004          | 6.771631        | N           | N        | N        | 1.6113      | 1.72E-09        | 0.16471         |
| 48 | 25.470<br>5 | Dehydroep<br>iandroster<br>one  |          |        | 2.548575        | 2.2E-05       | 2.297638      | 1.579<br>38 | 0.00016<br>3    | 104301.1        | N           | N        | N        | 1.5255<br>5 | 1.99E-05        | 8.64E-06        |
| 49 | 20.529<br>9 | D-<br>erythronol<br>actone 2    |          |        | 1.171288        | 0.30983<br>5  | 0.734753      | 1.148<br>02 | 0.00507<br>2    | 2.371432        | N           | N        | N        | 1.2001<br>8 | 0.001171        | 0.264525        |
| 50 | 29.861<br>4 | D-erythro-<br>sphingosin<br>e 1 | 5262     | C06124 | 3.27121         | 2.64255<br>8  | 1.687229      | 1.093<br>87 | 0.00714<br>4    | 0.638483        | N           | N        | N        | N           | N               | N               |
| 51 | 11.160<br>4 | D-Glyceric<br>acid              | 439194   | C00258 | 7.222751        | 7.83409<br>4  | 12.39153      | 1.101<br>28 | 0.01126<br>7    | 1.581743        | 1.0859<br>4 | 0.005219 | 1.715624 | N           | N               | N               |
| 52 | 18.921<br>8 | Diglycerol<br>2                 |          |        | 27.39385        | 6.58131<br>5  | 36.72294      | 1.41E+00    | 0.00077<br>2    | 5.579879        | N           | N        | N        | 1.2166<br>4 | 0.000966        | 0.240248        |
| 53 | 20.739      | Dihydroxy<br>acetone            | 670      | C00184 | 0.014461        | 0.30313<br>9  | 1.839494      | 1.233<br>26 | 0.00475<br>2    | 6.068147        | 1.2846<br>7 | 0.001831 | 127.1998 | N           | N               | N               |
| 54 | 20.153<br>3 | D-Talose 2                      |          |        | 47.04185        | 11.4845<br>2  | 30.96863      | N           | N               | N               | 1.2548<br>9 | 1.39E-03 | 0.658321 | 1.4751<br>4 | 2.70E-05        | 0.244134        |
| 55 | 9.5077<br>9 | epsilon-<br>Caprolacta<br>m     |          | C06593 | 1.029617        | 3.55728<br>4  | 0.454674      | 1.695<br>49 | 1.48E-<br>08    | 0.127815        | N           | N        | N        | 1.4493<br>4 | 3.85E-06        | 3.454957        |
| 56 | 10.509<br>3 | Ethanolam<br>ine                | 700      | C00189 | 580.8495        | 455.465<br>4  | 601.9354      | 1.108<br>08 | 0.00923<br>7    | 1.321583        | N           | N        | N        | N           | N               | N               |
| 57 | 12.155<br>1 | Ethyl<br>cinnamate<br>flavin    | 699414   |        | 2.026568        | 2.2E-05       | 3.690617      | 1.615<br>4  | 8.42E-<br>05    | 167535.3        | N           | N        | N        | 1.3391<br>7 | 0.000528        | 1.09E-05        |
| 58 | 15.56       | adenine<br>degrad<br>product    |          |        | 2.072325        | 1.71281<br>7  | 1.220121      | N           | N               | N               | 1.0976<br>6 | 0.005954 | 0.588769 | N           | N               | N               |
| 59 | 20.788<br>3 | fructose 1                      | 718      | C00354 | 3.296813        | 0.12956<br>8  | 2.261167      | 1.661<br>78 | 3.53E-<br>07    | 17.45154        | N           | N        | N        | 1.0900<br>7 | 0.006633        | 0.039301        |
| 60 | 17.176<br>8 | fucose 1                        | 439871   | C02985 | 1.729295        | 5.58049<br>6  | 10.05538      | N           | N               | N               | 1.0207<br>6 | 0.015125 | 5.814729 | 1.3139<br>5 | 0.000326        | 3.227035        |
| 61 | 16.648<br>2 | fucose 2                        | 439871   | C02985 | 2.243383        | 3.97562<br>1  | 7.370288      | 1.021       | 0.02398<br>5    | 1.853871        | 1.2563<br>2 | 0.002185 | 3.285345 | 1.1829<br>5 | 0.001624        | 1.772154        |
| 62 | 11.501<br>1 | fumaric<br>acid                 | 723      | C00122 | 15.74363        | 18.7034<br>7  | 29.09076      | 1.201<br>19 | 0.00442<br>4    | 1.555367        | 1.3238<br>8 | 0.00056  | 1.84778  | N           | N               | N               |
| 63 | 34.593<br>7 | Galactinol<br>1                 | 439451   | C01236 | 234.7089        | 129.937<br>3  | 417.118       | 1.64E+00    | 1.69E-<br>05    | 3.210147        | 1.3079<br>6 | 1.07E-03 | 1.777171 | 1.5519<br>2 | 1.56E-07        | 0.553611        |
| 64 | 24.628<br>4 | Galactinol<br>3                 | 16218555 |        | 0.725772        | 0.27292<br>5  | 1.967361      | 1.639<br>67 | 2.89E-<br>07    | 7.208435        | 1.2953<br>4 | 0.000191 | 2.710716 | N           | N               | N               |
| 65 | 20.415<br>3 | galactose 2                     | 439357   | C00124 | 8.063608        | 2.93133<br>5  | 4.491522      | N           | N               | N               | N           | N        | N        | 1.0873<br>2 | 0.004593        | 0.363526        |
| 66 | 19.629      | Gluconic<br>lactone 1           | 7027     | C00198 | 1.41E-05        | 4.01930<br>7  | 3.213165      | N           | N               | N               | 1.5445<br>8 | 2.22E-05 | 227967.8 | 1.6149<br>6 | 1.13E-06        | 285162.1        |
| 67 | 20.782<br>7 | Gluconic<br>lactone 2           | 7027     | C00198 | 85.46759        | 19.0636<br>4  | 15.89823      | N           | N               | N               | 1.5779      | 1.86E-08 | 0.186015 | 1.6108<br>2 | 1.85E-07        | 0.223051        |
| 68 | 20.165<br>4 | glucose 2                       |          | C00103 | 5020.921<br>101 | 9314.54<br>96 | 6869.253<br>9 | 1.204<br>07 | 0.00207<br>1567 | 0.737475<br>691 | N           | N        | N        | 1.3125<br>6 | 9.54939E-<br>05 | 1.855147<br>574 |
| 69 | 15.059<br>4 | Glucose-1-<br>phosphate         |          | C00103 | 24.15791        | 6.71584<br>5  | 16.52292      | 1.039<br>26 | 0.02468         | 2.46029         | N           | N        | N        | N           | N               | N               |
| 70 | 18.894      | glucuronic<br>acid 2            | 439782   | C02670 | 1.445326        | 4.85736<br>6  | 30.18022      | 1.472<br>91 | 0.00039<br>5    | 6.213289        | 1.4293<br>2 | 0.000166 | 20.88125 | N           | N               | N               |
| 71 | 13.496<br>7 | glutamine<br>1                  | 5961     | C00064 | 20.61575        | 25.2954<br>2  | 32.50995      | N           | N               | N               | 1.1772<br>7 | 0.004458 | 1.576948 | 1.0612<br>7 | 0.006252        | 1.226995        |

|     |             |                                            |         |        |          |              |          |              |              |          |             |          |          |             |          |          |
|-----|-------------|--------------------------------------------|---------|--------|----------|--------------|----------|--------------|--------------|----------|-------------|----------|----------|-------------|----------|----------|
| 72  | 13.278<br>7 | glutamine<br>3                             | 5961    | C00064 | 1.889018 | 1.98646<br>1 | 15.92764 | 1.000<br>58  | 0.03074<br>9 | 8.018095 | N           | N        | N        | N           | N        | N        |
| 73  | 10.427      | glycerol                                   | 753     | C00116 | 167.293  | 287.119<br>5 | 215.723  | N            | N            | N        | 1.1086<br>1 | 0.00493  | 1.289492 | N           | N        | N        |
| 74  | 24.955<br>1 | heptadeca<br>noic acid                     | 10465   |        | 37.63948 | 26.9411<br>4 | 41.22888 | 1.275<br>84  | 0.00189<br>1 | 1.530332 | N           | N        | N        | 1.2535      | 0.000275 | 0.715768 |
| 75  | 19.951<br>4 | hexadecan<br>e                             | 10459   | C08260 | 1.41E-05 | 3.18219<br>4 | 4.643486 | N            | N            | N        | 1.6295<br>6 | 5.92E-07 | 329446.3 | 1.4132<br>7 | 0.00018  | 225770.5 |
| 76  | 13.459<br>8 | indole-3-<br>acetic acid                   | 802     | C00954 | 0.676482 | 2.2E-05      | 0.480254 | N            | N            | N        | N           | N        | N        | 1.3558<br>7 | 0.000422 | 3.26E-05 |
| 77  | 24.674<br>8 | Indolelacta<br>te 2                        | 92904   | C02043 | 2.87477  | 12.5970<br>4 | 6.550944 | 1.181<br>07  | 0.00607<br>4 | 0.520038 | N           | N        | N        | 1.3189<br>9 | 0.00011  | 4.381931 |
| 78  | 21.810<br>5 | isocitric<br>acid 2                        | 5318532 | C00451 | 12.57504 | 4.15245<br>4 | 4.983046 | N            | N            | N        | 1.1273<br>2 | 0.002005 | 0.396265 | 1.2836<br>1 | 0.000856 | 0.330214 |
| 79  | 10.796<br>3 | Isoleucine                                 | 791     | C00407 | 32.54255 | 30.3937<br>1 | 84.1354  | 1.64E<br>+00 | 9.19E-<br>06 | 2.768185 | 1.5192<br>6 | 2.82E-05 | 2.585397 | N           | N        | N        |
| 80  | 29.185<br>4 | Isopropyl-beta-D-<br>thiogalactopyranoside |         |        | 603.3503 | 403.353<br>3 | 90.85038 | N            | N            | N        | 1.3235<br>3 | 6.80E-05 | 0.150576 | N           | N        | N        |
| 81  | 8.1024<br>7 | lactic acid                                | 107689  | C00186 | 58.3901  | 64.759       | 36.96721 | 1.090<br>67  | 0.00860<br>8 | 0.570843 | 1.0696<br>6 | 0.00403  | 0.633108 | N           | N        | N        |
| 82  | 26.133<br>9 | Lactobioni<br>c Acid 1                     |         |        | 360.4487 | 518.138<br>4 | 518.7005 | N            | N            | N        | 1.0358<br>3 | 0.008524 | 1.439041 | N           | N        | N        |
| 83  | 28.447<br>6 | lactose 1                                  |         |        | 8.016868 | 3.77761<br>6 | 3.81741  | N            | N            | N        | 1.3623<br>8 | 2.95E-05 | 0.476172 | 1.1248<br>4 | 0.002224 | 0.471208 |
| 84  | 11.912<br>2 | L-<br>Allothreon<br>ine 1                  | 99289   | C05519 | 49.14429 | 65.8712<br>1 | 89.38449 | N            | N            | N        | 1.4008<br>8 | 0.000103 | 1.818817 | 1.2896<br>7 | 0.000174 | 1.340363 |
| 85  | 12.630<br>8 | L-dopa 2                                   | 836     | C00355 | 1.242659 | 2.45454<br>2 | 2.699289 | N            | N            | N        | 1.3749      | 2.06E-05 | 2.172187 | 1.151       | 0.001545 | 1.975233 |
| 86  | 24.615<br>5 | linoleic<br>acid                           | 3931    | C01595 | 90.54071 | 30.1934<br>7 | 147.2064 | 1.776<br>08  | 9.19E-<br>08 | 4.875438 | 1.4695<br>5 | 9.50E-05 | 1.625859 | 1.7056<br>5 | 5.17E-16 | 0.333479 |
| 87  | 23.084<br>6 | Linoleic<br>acid<br>methyl<br>ester        |         |        | 6.460911 | 5.16735<br>3 | 16.50972 | 1.037<br>87  | 0.01423<br>9 | 3.195006 | 1.002       | 0.018282 | 2.555324 | N           | N        | N        |
| 88  | 24.694<br>3 | linolenic<br>acid                          | 860     | C06427 | 15.48884 | 5.15647<br>8 | 18.97608 | 1.754<br>96  | 9.40E-<br>08 | 3.680047 | N           | N        | N        | 1.6928      | 1.39E-14 | 0.332916 |
| 89  | 13.332<br>7 | L-Malic<br>acid                            | 222656  | C00149 | 664.732  | 1112.01<br>6 | 354.7091 | 1.719<br>65  | 8.33E-<br>09 | 0.318979 | 1.4804<br>7 | 2.22E-06 | 0.533612 | 1.4835<br>1 | 8.33E-06 | 1.672878 |
| 90  | 26.955<br>5 | L-Threose<br>1                             | 94176   | C03109 | 11.31202 | 4.19343<br>2 | 5.51266  | N            | N            | N        | N           | N        | N        | 1.0134<br>2 | 0.011871 | 0.370706 |
| 91  | 15.639<br>3 | maleic acid                                | 444266  | C01384 | 4.960352 | 11.0653<br>5 | 6.367362 | 1.40E<br>+00 | 0.00011<br>9 | 0.575433 | N           | N        | N        | 1.3561<br>2 | 4.14E-05 | 2.230758 |
| 92  | 8.6640<br>5 | Maleimide                                  |         |        | 2.132515 | 1.17600<br>7 | 3.981952 | 1.308<br>44  | 0.00054<br>7 | 3.385993 | 1.1132<br>6 | 0.004485 | 1.867256 | N           | N        | N        |
| 93  | 8.3398<br>8 | malonic<br>acid 1                          |         |        | 18.12768 | 13.9936<br>6 | 5.337123 | N            | N            | N        | 1.4973<br>3 | 4.46E-06 | 0.294418 | N           | N        | N        |
| 94  | 13.732<br>5 | malonic<br>acid 2                          | 70615   |        | 2.232583 | 0.73927<br>8 | 0.959232 | N            | N            | N        | 1.1524<br>7 | 0.001222 | 0.429651 | 1.3598<br>1 | 0.00028  | 0.331131 |
| 95  | 19.576<br>7 | mannose 1                                  | 644175  | C00636 | 2.27604  | 37.0546<br>2 | 25.10041 | N            | N            | N        | 1.4769<br>6 | 1.67E-06 | 11.02811 | 1.2477<br>2 | 0.001035 | 16.2803  |
| 96  | 20.548<br>3 | methyl<br>heptadeca<br>noate               |         |        | 10.21749 | 1.44364<br>5 | 12.60037 | 1.728<br>74  | 3.13E-<br>06 | 8.728164 | N           | N        | N        | 1.5234<br>6 | 1.89E-05 | 0.141292 |
| 97  | 20.277<br>3 | Methyl<br>Palmitoleat<br>e                 |         |        | 113.6915 | 121.827<br>7 | 187.0347 | 1.35E<br>+00 | 0.00084<br>2 | 1.535239 | 1.2511<br>1 | 0.000432 | 1.645107 | N           | N        | N        |
| 98  | 9.4139<br>4 | Methyl<br>Phosphate                        | 654     | C06608 | 18.46806 | 6.33816      | 10.99532 | N            | N            | N        | 1.1028<br>1 | 2.26E-03 | 0.59537  | 1.4163<br>4 | 6.51E-05 | 0.343196 |
| 99  | 10.067<br>9 | Methylmal<br>onic acid                     |         |        | 1.092509 | 1.87989<br>9 | 2.719165 | N            | N            | N        | 1.39540     | 0.000161 | 2.488917 | 1.1035<br>1 | 0.004208 | 1.720717 |
| 100 | 31.063<br>4 | Monoolein                                  | 5280634 | C04230 | 3.150916 | 3.05503<br>3 | 4.648481 | 1.489<br>37  | 0.00011<br>4 | 1.521582 | 1.3307<br>2 | 0.000206 | 1.475279 | N           | N        | N        |

|     |             |                                            |         |        |          |              |          |              |              |          |             |          |          |             |          |          |
|-----|-------------|--------------------------------------------|---------|--------|----------|--------------|----------|--------------|--------------|----------|-------------|----------|----------|-------------|----------|----------|
| 101 | 18.313<br>5 | mucic acid                                 | 3037582 | C01807 | 138.6985 | 146.272<br>5 | 236.3835 | 1.374<br>42  | 0.00047      | 1.616049 | 1.3046<br>2 | 0.000241 | 1.704298 | N           | N        | N        |
| 102 | 23.106      | myo-<br>inositol                           | 892     | C00137 | 171.5473 | 17.6894<br>2 | 15.22865 | N            | N            | N        | 1.1045<br>7 | 0.004441 | 0.088772 | 1.1347<br>8 | 0.004759 | 0.103117 |
| 103 | 19.450<br>9 | N-Acetyl-<br>beta-D-<br>mannosam-<br>ine 2 |         |        | 4.25047  | 8.01696<br>2 | 150.1214 | 1.543<br>11  | 0.00016      | 18.72548 | 1.4416<br>9 | 0.000145 | 35.31879 | N           | N        | N        |
| 104 | 26.387<br>6 | N-<br>Carbamylg-<br>lutamate 2             |         |        | 17.611   | 0.49282<br>7 | 0.342634 | N            | N            | N        | 1.2350<br>2 | 0.001163 | 0.019456 | 1.2702<br>8 | 0.001215 | 0.027984 |
| 105 | 9.2802<br>2 | N-epsilon-<br>Acetyl-L-<br>lysine 2        | 92832   | C02727 | 27.4327  | 44.7570<br>8 | 58.58672 | N            | N            | N        | 1.3942<br>9 | 1.36E-05 | 2.135653 | 1.2069<br>7 | 0.000642 | 1.631523 |
| 106 | 25.873<br>4 | N-Methyl-<br>L-glutamic<br>acid 3          |         | C01046 | 1.912967 | 0.20186<br>7 | 2.588447 | 1.754<br>03  | 1.52E-<br>10 | 12.82253 | N           | N        | N        | 1.6092<br>9 | 1.76E-09 | 0.105526 |
| 107 | 8.9559<br>2 | noradrenal-<br>ine                         | 439260  | C00547 | 34.45356 | 48.1599<br>5 | 58.963   | N            | N            | N        | 1.3202<br>4 | 7.43E-04 | 1.711376 | 1.3756<br>2 | 6.95E-05 | 1.397822 |
| 108 | 9.5245<br>9 | Norleucine<br>2                            | 21236   |        | 3.067261 | 1.99793<br>2 | 5.760037 | 1.402<br>15  | 0.00021<br>9 | 2.882999 | 1.1458<br>1 | 0.004669 | 1.877909 | N           | N        | N        |
| 109 | 15.268<br>4 | ornithine                                  | 6262    | C00077 | 1.41E-05 | 4.91811      | 4.270582 | N            | N            | N        | 1.2697<br>4 | 0.002171 | 302989.5 | 1.2581<br>7 | 0.001404 | 348930.4 |
| 110 | 13.307      | oxalic acid                                | 971     | C00209 | 2.28192  | 2.60621<br>6 | 2.05E-05 | 1.184<br>56  | 0.00494<br>9 | 7.88E-06 | 1.4507<br>5 | 4.58E-05 | 9E-06    | N           | N        | N        |
| 111 | 14.054<br>3 | oxoproline                                 | 7405    | C01879 | 399.0452 | 329.906<br>4 | 455.243  | N            | N            | N        | N           | N        | N        | 1.0571<br>8 | 0.004065 | 0.826739 |
| 112 | 22.368<br>8 | palmitic<br>acid                           | 985     | C00249 | 147.4451 | 74.3786<br>8 | 193.1643 | 1.72E<br>+00 | 3.77E-<br>07 | 2.597039 | 1.2140<br>3 | 3.14E-03 | 1.310076 | 1.6618<br>9 | 1.10E-09 | 0.50445  |
| 113 | 11.722<br>2 | Pelargonic<br>acid                         | 8158    | C01601 | 0.974957 | 4.50381      | 3.128425 | N            | N            | N        | N           | N        | N        | 1.0443<br>6 | 0.010129 | 4.619497 |
| 114 | 23.74       | pentadeca-<br>noic acid                    | 13849   |        | 1.964791 | 0.75046<br>5 | 2.126913 | 1.74E<br>+00 | 3.50E-<br>07 | 2.834128 | N           | N        | N        | 1.6371<br>7 | 4.12E-08 | 0.381957 |
| 115 | 15.646      | phenylalan-<br>ine 1                       |         |        | 9.611323 | 8.91426<br>7 | 19.23376 | 1.63E<br>+00 | 1.00E-<br>05 | 2.157637 | 1.4328<br>2 | 1.44E-05 | 2.001156 | N           | N        | N        |
| 116 | 10.494      | phosphate                                  | 1061    | C00009 | 637.1568 | 299.675<br>5 | 203.4365 | 1.105<br>64  | 0.00763<br>4 | 0.678856 | 1.4449<br>1 | 9.42E-06 | 0.319288 | 1.3779<br>1 | 0.000139 | 0.470332 |
| 117 | 10.971<br>2 | proline                                    | 145742  | C00148 | 1.036378 | 4.22160<br>4 | 6.495746 | N            | N            | N        | N           | N        | N        | 1.0130<br>6 | 0.006378 | 4.07342  |
| 118 | 9.9865<br>5 | Prostaglan-<br>din E2 2                    | 5280360 | C00584 | 3.405225 | 0.80885<br>9 | 3.570587 | 1.586<br>08  | 3.05E-<br>06 | 4.414348 | N           | N        | N        | 1.2049<br>4 | 0.001107 | 0.237535 |
| 119 | 31.966<br>9 | prunin<br>degr. Prod.<br>2                 |         |        | 56.36214 | 25.7497<br>9 | 74.77798 | 1.665<br>71  | 2.39E-<br>06 | 2.904023 | N           | N        | N        | 1.5670<br>2 | 4.64E-08 | 0.456863 |
| 120 | 16.680<br>2 | ribitol                                    | 827     | C00474 | 2.984962 | 4.38340<br>5 | 1.193426 | 1.008<br>91  | 0.01475<br>7 | 0.27226  | N           | N        | N        | N           | N        | N        |
| 121 | 25.461<br>1 | ribulose-5-<br>phosphate 2                 | 439167  | C00117 | 3.382389 | 1.8884       | 1.883675 | N            | N            | N        | 1.1633<br>5 | 0.00147  | 0.556907 | 1.3602<br>2 | 0.000168 | 0.558304 |
| 122 | 32.178<br>4 | salicin                                    | 439503  | C01451 | 1.681587 | 0.18324<br>8 | 0.010116 | N            | N            | N        | 1.4020<br>3 | 0.000114 | 0.006015 | 1.2827<br>5 | 0.000214 | 0.108973 |
| 123 | 8.5804<br>1 | sarcosine                                  | 1088    | C00213 | 79.43472 | 112.659<br>3 | 310.7912 | 1.67E<br>+00 | 1.05E-<br>05 | 2.758682 | 1.5884<br>5 | 3.00E-06 | 3.912536 | 1.4237<br>3 | 9.76E-06 | 1.418263 |
| 124 | 11.569<br>6 | serine 1                                   | 106     | C01005 | 32.48561 | 35.8778<br>1 | 75.87902 | 1.55E<br>+00 | 0.00010<br>2 | 2.114929 | 1.4480<br>8 | 3.23E-05 | 2.335774 | N           | N        | N        |
| 125 | 34.206<br>7 | shikimic<br>acid                           | 8742    | C00493 | 36.05541 | 28.2023<br>9 | 13.06826 | 1.456<br>82  | 0.00017<br>4 | 0.463374 | N           | N        | N        | N           | N        | N        |
| 126 | 20.308<br>5 | sorbitol                                   | 5780    | C00794 | 0.201988 | 2.24736      | 2.927416 | N            | N            | N        | 1.2810<br>1 | 7.47E-04 | 14.49304 | 1.4770<br>6 | 1.33E-06 | 11.12622 |
| 127 | 31.892<br>8 | squalene                                   | 1105    | C00751 | 59.9056  | 3.10537<br>4 | 31.21681 | 1.492<br>55  | 0.00057<br>8 | 10.05251 | 1.0784<br>5 | 3.05E-03 | 0.5211   | 1.5339<br>7 | 1.60E-05 | 0.051838 |
| 128 | 27.031<br>5 | stearic acid                               | 5281    | C01530 | 2.590972 | 0.20358<br>8 | 3.876497 | 1.72E<br>+00 | 1.62E-<br>07 | 19.0409  | 1.0129<br>3 | 7.54E-03 | 1.496156 | 1.5554<br>6 | 2.64E-07 | 0.078576 |

|     |             |                                                             |         |        |          |              |          |             |              |          |             |          |          |             |          |          |
|-----|-------------|-------------------------------------------------------------|---------|--------|----------|--------------|----------|-------------|--------------|----------|-------------|----------|----------|-------------|----------|----------|
| 129 | 15.723<br>8 | Tagatose 1                                                  |         |        | 88.45542 | 48.5220<br>7 | 59.2265  | N           | N            | N        | 1.3932<br>4 | 1.64E-05 | 0.669563 | 1.5365<br>6 | 1.25E-07 | 0.548548 |
| 130 | 27.347<br>7 | Tagatose 2                                                  |         |        | 6.535618 | 2.48244<br>4 | 0.521097 | N           | N            | N        | 1.0349<br>3 | 0.006992 | 0.079732 | N           | N        | N        |
| 131 | 26.839<br>2 | Thioctami<br>de 1                                           | 863     | C00248 | 332.7942 | 174.711<br>5 | 129.7325 | N           | N            | N        | 1.2000<br>1 | 0.000754 | 0.389828 | 1.0271<br>4 | 0.006915 | 0.524984 |
| 132 | 25.178<br>3 | Threitol                                                    | 169019  |        | 15.42231 | 14.1495      | 25.4334  | 1.35E+00    | 0.00093<br>2 | 1.797476 | 1.19860     | 0.002508 | 1.64913  | N           | N        | N        |
| 133 | 14.264<br>1 | Threonic<br>acid<br>thymidine<br>5'-<br>monophos<br>phate 1 | 151152  | C01620 | 408.3579 | 1173.13<br>2 | 353.2065 | 1.68E+00    | 1.42E-06     | 0.30108  | N           | N        | N        | 1.5708<br>7 | 2.98E-06 | 2.872803 |
| 134 | 24.457<br>9 |                                                             | 9700    | C00364 | 22.08743 | 5.53929<br>3 | 31.64236 | 1.673<br>94 | 1.90E-05     | 5.712346 | N           | N        | N        | 1.6592<br>6 | 1.54E-08 | 0.250789 |
| 135 | 23.280<br>9 | trans-3,5-Dimethoxy-4-<br>hydroxycinnamaldehyde 1           |         |        | 1.010234 | 0.52385<br>4 | 0.109779 | 1.188<br>53 | 0.00261<br>1 | 0.209559 | 1.4801<br>5 | 8.23E-07 | 0.108666 | 1.2029<br>2 | 0.000617 | 0.518547 |
| 136 | 13.952<br>6 | trans-4-<br>hydroxy-<br>L-proline 2                         | 5810    | C01157 | 0.191149 | 0.57929<br>2 | 1.363403 | N           | N            | N        | 1.0794<br>9 | 0.006663 | 7.132678 | N           | N        | N        |
| 137 | 24.363      | Turanose 2                                                  | 5460935 |        | 7.318724 | 4.13200<br>8 | 0.569902 | 1.571<br>24 | 1.01E-05     | 0.137924 | 1.5236<br>2 | 1.85E-07 | 0.077869 | 1.2739<br>1 | 0.000492 | 0.56458  |
| 138 | 20.637<br>8 | tyrosine 1                                                  | 30819   | C06501 | 32.53049 | 24.1072<br>8 | 56.6907  | 1.566<br>97 | 3.39E-05     | 2.351601 | 1.2120<br>3 | 0.000969 | 1.742694 | N           | N        | N        |
| 139 | 11.416<br>8 | uracil                                                      | 1174    | C00106 | 1.420484 | 3.47286<br>7 | 6.080578 | 1.25E+00    | 0.00138<br>3 | 1.750881 | 1.6143<br>1 | 1.45E-07 | 4.280638 | 1.0946<br>1 | 0.005904 | 2.444848 |
| 140 | 9.8543      | valine                                                      | 1182    | C00183 | 35.56136 | 36.1983      | 118.6639 | 1.707<br>07 | 2.83E-06     | 3.278163 | 1.5794<br>3 | 3.20E-06 | 3.336878 | N           | N        | N        |
| 141 | 25.343<br>1 | xylitol                                                     | 6912    | C00379 | 15.66167 | 10.3344<br>5 | 9.820991 | N           | N            | N        | 1.3774<br>5 | 2.42E-05 | 0.627072 | 1.3097<br>6 | 0.000147 | 0.659857 |
| 142 | 27.498<br>9 | Zymostero<br>12                                             | 92746   | C05437 | 86.1823  | 12.5858<br>5 | 85.45486 | 1.529<br>67 | 0.00017<br>4 | 6.789758 | N           | N        | N        | 1.4425<br>2 | 4.02E-05 | 0.146037 |

**Table S3.** Changes in the relative content of metabolites related to metabolic pathways in TW, OW and NW.

| RT                    | Name             | KEGG   | Relative contents (N) | Relative contents (O) | Relative contents (T) | VIP(T/O)    | p-value      | FC(T/O)      | Log <sub>2</sub> T/O | VIP(T/N) | p-value  | FC (T/N)     | Log <sub>2</sub> T/N | VIP (O/N) | p-value      | FC (O/N)     | Log <sub>2</sub> O/N |
|-----------------------|------------------|--------|-----------------------|-----------------------|-----------------------|-------------|--------------|--------------|----------------------|----------|----------|--------------|----------------------|-----------|--------------|--------------|----------------------|
| TCA cycle             |                  |        |                       |                       |                       |             |              |              |                      |          |          |              |                      |           |              |              |                      |
| 13.332<br>7           | L-Malic acid     | C00149 | 664.732               | 1112.016              | 354.7091              | 1.7196<br>5 | 8.33E-09     | 0.31897<br>9 | -<br>0.60662         | 1.48047  | 2.22E-06 | 0.53361<br>2 | -<br>1.10359         | 1.48351   | 8.33E-06     | 1.67287<br>8 | 1.347106             |
| 11.501<br>1           | fumaric acid     | C00122 | 15.74363              | 18.70347              | 29.09076              | 1.2011<br>9 | 0.00442<br>4 | 1.55536<br>7 | 1.56923              | 1.32388  | 0.000561 | 1.84778      | 1.12893<br>2         | N         | N            | N            | 0                    |
| 18.468<br>5           | citric acid      | C00158 | 11.37489              | 17.44613              | 3.168419              | 1.7980<br>7 | 1.69E-13     | 0.18161<br>2 | -<br>0.40633         | 1.28595  | 0.000450 | 0.27854<br>5 | -<br>0.54229         | 1.10255   | 0.004721     | 1.53374      | 1.620604             |
| 21.810<br>5           | isocitric acid 2 | C00451 | 12.57504              | 4.152454              | 4.983046              | N           | N            | N            | 0                    | 1.12732  | 0.002000 | 0.39626<br>5 | -0.7488              | 1.28361   | 0.000850     | 0.33021<br>4 | -0.62558             |
| 15.639<br>3           | maleic acid      | C01384 | 4.960352              | 11.06535              | 6.367362              | 1.40E+00    | 0.00011<br>9 | 0.57543<br>3 | -<br>1.25426         | N        | N        | N            | 0                    | 1.35612   | 4.14E-05     | 2.23075<br>8 | 0.863905             |
| Amino acid metabolism |                  |        |                       |                       |                       |             |              |              |                      |          |          |              |                      |           |              |              |                      |
| 13.81                 | aspartic acid 1  | C00402 | 57.56193              | 107.6623              | 129.8358              | N           | N            | N            | 0                    | 1.51195  | 4.17E-06 | 2.255580     | 0.85215<br>1         | 1.57683   | 1.56E-08     | 1.87037<br>4 | 1.107019             |
| 12.561<br>8           | aspartic acid 2  | C00049 | 3.153632              | 4.678569              | 6.914781              | N           | N            | N            | 0                    | 1.52579  | 2.74E-07 | 2.19264<br>1 | 0.88287              | N         | N            | N            | 0                    |
| 10.796<br>3           | Isoleucine       | C00407 | 32.54255              | 30.39371              | 84.1354               | 1.64E+00    | 9.19E-06     | 2.768180     | 0.68076<br>3         | 1.51926  | 2.82E-05 | 2.585390     | 0.72972<br>1         | N         | N            | N            | 0                    |
| 9.5245<br>9           | Norleucin e 2    |        | 3.067261              | 1.997932              | 5.760037              | 1.4021<br>5 | 0.00021<br>9 | 2.882990     | 0.65463<br>4         | 1.14581  | 0.004661 | 1.877901     | 0.09995<br>6         | N         | N            | N            | 0                    |
| 10.971<br>2           | proline          | C00148 | 1.036378              | 4.221604              | 6.495746              | N           | N            | N            | 0                    | N        | N        | N            | 0                    | 1.01306   | 0.00637<br>8 | 4.07342      | 0.493525             |
| 11.569<br>6           | serine 1         | C01005 | 32.48561              | 35.87781              | 75.87902              | 1.55E+00    | 0.00010<br>2 | 2.114920     | 0.92540<br>4         | 1.44808  | 3.23E-05 | 2.33577<br>4 | 0.81706              | N         | N            | N            | 0                    |

|                                                     |                     |        |          |          |          |          |          |                 |         |                        |                        |                 |                 |                 |                 |          |          |   |
|-----------------------------------------------------|---------------------|--------|----------|----------|----------|----------|----------|-----------------|---------|------------------------|------------------------|-----------------|-----------------|-----------------|-----------------|----------|----------|---|
| 20.6378                                             | tyrosine 1          | C06501 | 32.53049 | 24.10728 | 56.6907  | 1.56697  | 3.39E-05 | 2.351600.810607 | 1.21203 | 0.000961.742691.247949 | N                      | N               | N               | 0               |                 |          |          |   |
| 9.8543                                              | valine              | C00183 | 35.56136 | 36.1983  | 118.6639 | 1.70707  | 2.83E-06 | 3.278160.583803 | 1.57943 | 3.20E-06               | 3.336870.575208        | N               | N               | N               | 0               |          |          |   |
| Glycolysis                                          |                     |        |          |          |          |          |          |                 |         |                        |                        |                 |                 |                 |                 |          |          |   |
| 28.3075                                             | arbutin             | C06186 | 0.017975 | 0.816007 | 2.0204   | 1.22596  | 0.002378 | 2.475960.764531 | 1.65816 | 2.74E-08               | 112.4019               | 0.146789        | 1.079340.007651 | 45.39691        | 0.181669        |          |          |   |
| 32.1784                                             | salicin             | C01451 | 1.681587 | 0.183248 | 0.010116 | N        | N        | N               | 0       | 1.40203                | 0.000110.006014        | -               | 1.282754        | 0.000210.108973 | -0.3127         |          |          |   |
| 15.0594                                             | Glucose-1-phosphate | C00103 | 24.15791 | 6.715845 | 16.52292 | 1.03926  | 0.02468  | 2.460295        | 0.76992 | N                      | N                      | N               | 0               | N               | 0               |          |          |   |
| Fructose and mannose metabolism                     |                     |        |          |          |          |          |          |                 |         |                        |                        |                 |                 |                 |                 |          |          |   |
| 20.3085                                             | sorbitol            | C00794 | 0.201988 | 2.24736  | 2.927416 | N        | N        | N               | 0       | 1.28101                | 7.47E-04               | 14.49300.259249 | 1.47706         | 1.33E-06        | 11.12622        | 0.287696 |          |   |
| 19.5767                                             | mannose 1           | C00636 | 2.27604  | 37.05462 | 25.10041 | N        | N        | N               | 0       | 1.47696                | 1.67E-06               | 11.02810.288751 | 1.247725        | 0.001035        | 16.2803         | 0.248444 |          |   |
| 20.7883                                             | fructose 1          | C00354 | 3.296813 | 0.129568 | 2.261167 | 1.66178  | 3.53E-07 | 17.45150.242404 | N       | N                      | N                      | 0               | 1.090073        | 0.006630.039301 | -0.21417        |          |          |   |
| 17.1768                                             | fucose 1            | C02985 | 1.729295 | 5.580496 | 10.05538 | N        | N        | N               | 0       | 1.02076                | 0.015125.814720.393745 | 1.313959        | 0.000323.227036 | 0.591643        |                 |          |          |   |
| 16.6482                                             | fucose 2            | C02985 | 2.243383 | 3.975621 | 7.370288 | 1.021    | 0.023985 | 1.853871.122913 | 1.25632 | 0.002183.285340.582735 | 1.182955               | 0.001621.772154 | 1.211381        |                 |                 |          |          |   |
| Starch and sucrose metablos im                      |                     |        |          |          |          |          |          |                 |         |                        |                        |                 |                 |                 |                 |          |          |   |
| 19.9109                                             | glucose 2           | C00031 | 4315.896 | 152.188  | 2.419958 | N        | N        | N               | 0       | 1.41601                | 8.94E-05               | 0.000561        | -0.0926         | 1.427289        | 9.06E-05        | 0.035262 | -0.20722 |   |
| 18.894                                              | glucuronic acid 2   | C00191 | 1.445326 | 4.857366 | 30.18022 | 1.47291  | 0.000395 | 6.213280.379459 | 1.42932 | 0.0001620.88120.228096 | N                      | N               | N               | 0               |                 |          |          |   |
| Galactose metabolism                                |                     |        |          |          |          |          |          |                 |         |                        |                        |                 |                 |                 |                 |          |          |   |
| 34.5937                                             | Galactinol 1        | C01236 | 234.7089 | 129.9373 | 417.118  | 1.64E+00 | 1.69E-05 | 3.210140.594304 | 1.30796 | 1.07E-03               | 1.777171.205421        | 1.551926        | 1.56E-07        | 0.553611        | -1.17226        |          |          |   |
| 24.6284                                             | Galactinol 3        |        | 0.725772 | 0.272925 | 1.967361 | 1.63967  | 2.89E-07 | 7.208430.350915 | 1.29534 | 0.000192.710710.695081 | N                      | N               | N               | 0               |                 |          |          |   |
| 20.4153                                             | galactose 2         | C00124 | 8.063608 | 2.931335 | 4.491522 | N        | N        | N               | 0       | N                      | N                      | N               | 0               | 1.087323        | 0.004590.363526 | -0.68499 |          |   |
| Pentose and glucuronate interconversions            |                     |        |          |          |          |          |          |                 |         |                        |                        |                 |                 |                 |                 |          |          |   |
| 25.3431                                             | xylitol             |        | 15.66167 | 10.33445 | 9.820991 | N        | N        | N               | 0       | 1.37745                | 2.42E-05               | 0.627072        | -               | 1.309767        | 0.000140.659857 | -1.66729 |          |   |
| 16.6802                                             | ribitol             | C00474 | 2.984962 | 4.383405 | 1.193426 | 1.00891  | 0.014757 | 0.27226         | -       | N                      | N                      | N               | 0               | N               | N               | N        | 0        |   |
| Phenylalanine, tyrosine and tryptophan biosynthesis |                     |        |          |          |          |          |          |                 |         |                        |                        |                 |                 |                 |                 |          |          |   |
| 34.2067                                             | shikimic acid       | C00493 | 36.05541 | 28.20239 | 13.06826 | 1.45682  | 0.000174 | 0.463374        | -0.9011 | N                      | N                      | N               | 0               | N               | N               | N        | 0        |   |
| 15.646                                              | phenylalnine 1      |        | 9.611323 | 8.914267 | 19.23376 | 1.63E+00 | 1.00E-05 | 2.157630.901347 | 1.43282 | 1.44E-05               | 2.001150.999166        | N               | N               | N               | 0               |          |          |   |
| Phenylpropanoid biosynthesis                        |                     |        |          |          |          |          |          |                 |         |                        |                        |                 |                 |                 |                 |          |          |   |
| 20.7043                                             | coniferyl alcohol   | C00590 | 1.352264 | 1.007827 | 0.440554 | 1.39E+00 | 0.000352 | 0.437132        | -       | 1.45511                | 5.12E-06               | 0.32579         | -               | 0.61805         | N               | N        | N        | 0 |

Notes: Differential metabolites related to some KEGG pathways were significantly enriched(VIP >1,  $p < 0.05$ ) in TW, OW and NW. T/O represents T vs O, latter are controls, and others are similar.
